# Supplementary material for: KDM6B promotes activation of the oncogenic CDK4/6-pRB-E2F pathway by maintaining enhancer activity in MYCN-amplified neuroblastoma
Source: PubMed Central journal article supplement (PMC8664842; doi:10.1038/s41467-021-27502-2), 2021-12-10
Supplement: 41467_2021_27502_MOESM1_ESM.pdf [file 41467_2021_27502_MOESM1_ESM.pdf]

## Supplementary Information

**a**

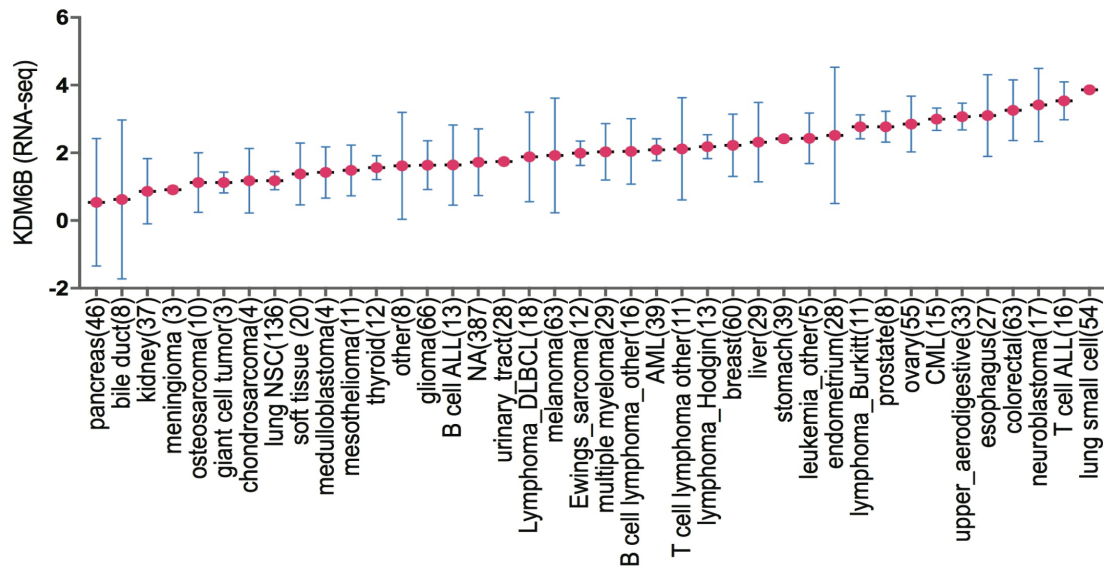

**b**

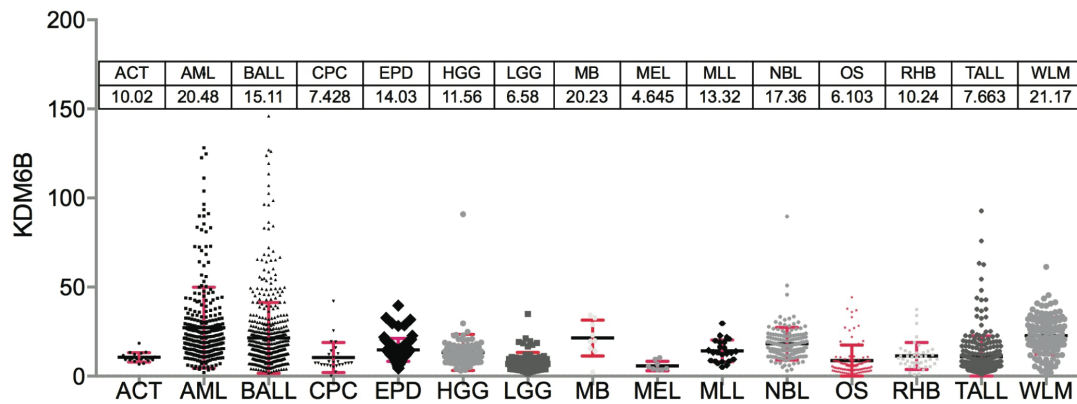

**Supplementary Fig. 1 KDM6B is highly expressed in human neuroblastoma.** **a** The expression of *KDM6B* from different cancer lineages. The RNA-seq data was downloaded from <https://portals.broadinstitute.org/ccle>. Y-axis represents the Fragment Per Kilobase of transcript per Million (FPKM) mapped reads. Sample size for each type of cancer lineage is indicated in bracket of x-axis. Data are represented as mean  $\pm$  SD. **b** The expression of *KDM6B* from different cancer lineages. The RNA-seq data was downloaded from <https://pecan.stjude.cloud>. Y-axis represents the Fragment Per Kilobase of transcript per Million (FPKM) mapped reads. Each dot represents one tumor sample. X-axis indicates the tumor types. N=20 for ACT (Adrenocortical tumor), n=306 for AML (Acute myeloid leukemia), n=531 for BALL(B-cell acute lymphoblastic leukemia), n=27 for CPC (Choroid plexus carcinoma), n=82 for HGG (High-grade glioma), n=78 for LGG (Low-grade glioma), n=9 for MB (Medulloblastoma), n=8 for MEL (Merkel cell carcinoma), n=24 for MLL (Mixed-lineage leukemia),

n=160 for NBL (Neuroblastoma), n=107 for OS (Osteosarcoma), n=45 for RHB (Rhabdomyosarcoma), n=264 for TALL (T-cell acute lymphoblastic leukemia), n=125 for WML (Wilm's tumor). Data are represented as mean  $\pm$  SD.

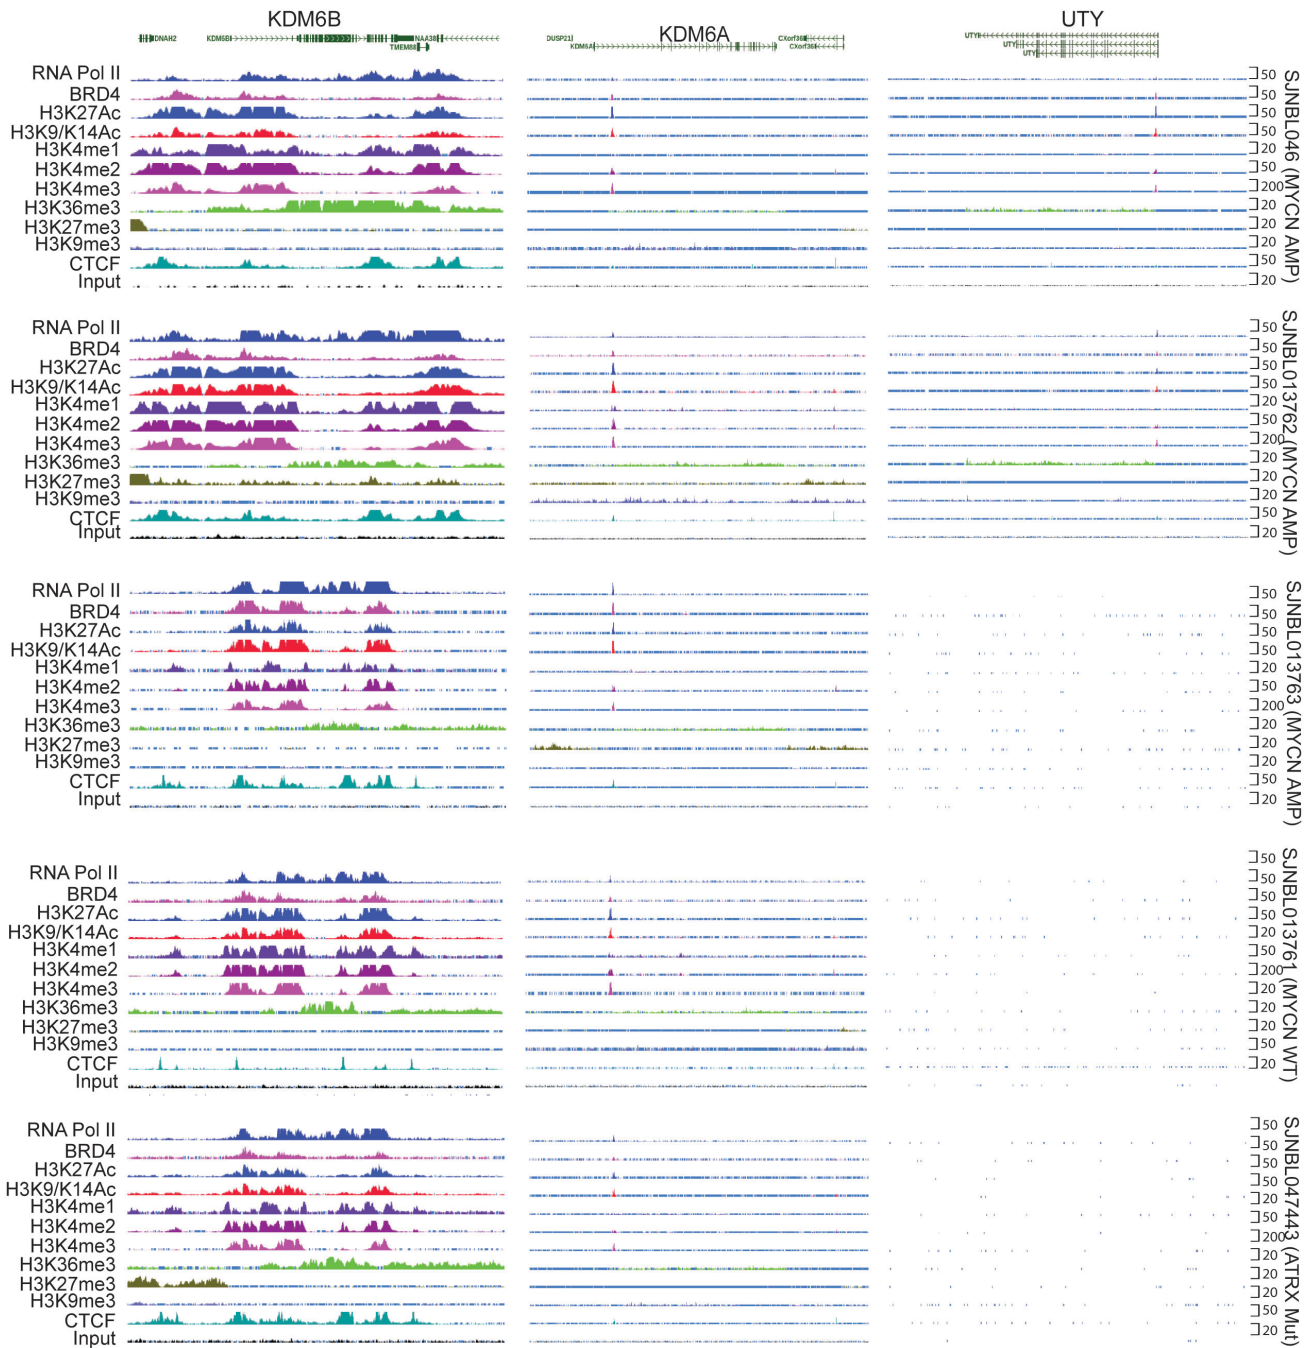

**Supplementary Fig. 2 Epigenetic landscape of KDM6A, KDM6B and UTY.** The epigenetic landscapes consisting of histone marks and transcription factor binding distinguish KDM6B from KDM6A and UTY in primary neuroblastoma tissues with *MYCN* amplification (SJNBL046, SKNBL013762, SJNBL013763), without *MYCN* amplification (SJNBL013761), or with *ATRX* mutation (SJNBL047443).

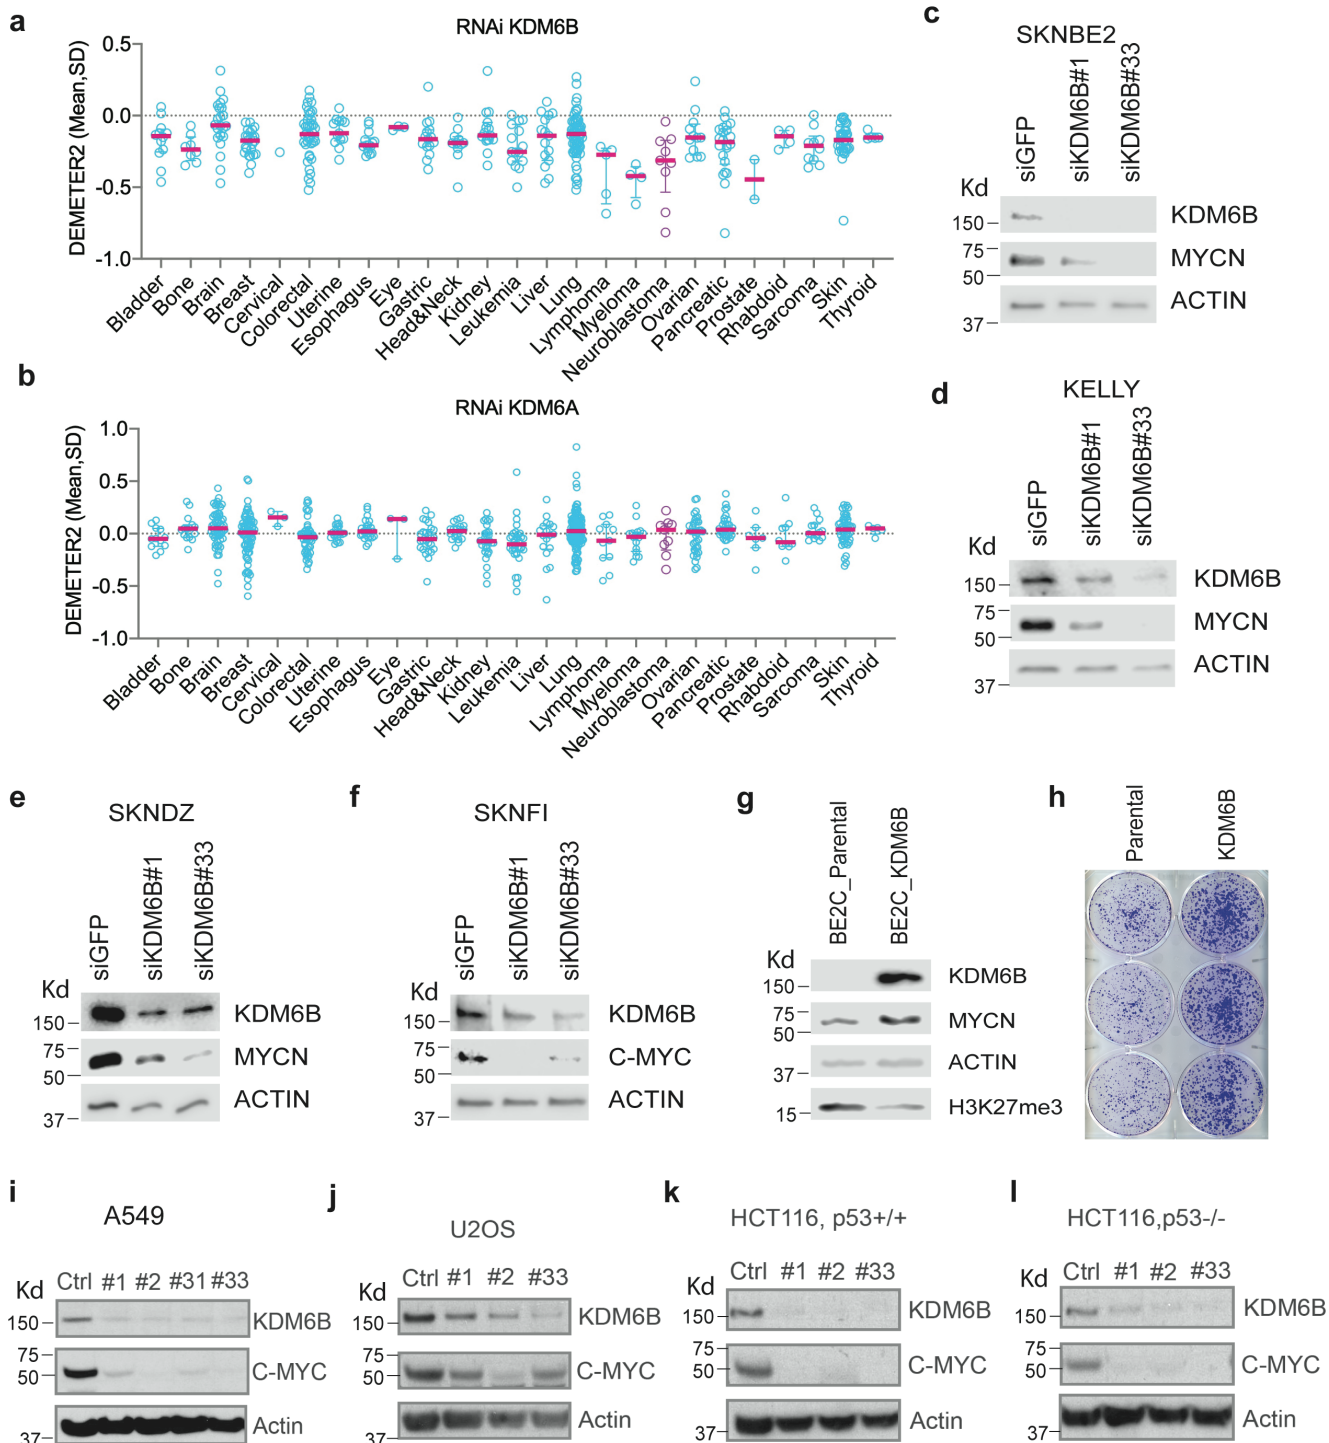

**Supplementary Fig. 3 KDM6B regulates MYC expression.** **a, b** The DEMETER2 score of an RNAi screen across 25 cancer lineages. DEMETER2 is a model that scores gene dependencies in 712 cancer cell lines that have been evaluated in three different large-scale pooled RNAi screens (DepMap.org). The y-axis represents DEMETER2 score. The x-axis indicates cancer lineages. Each dot represents one cancer cell line. N= 15 for bone, n=55 for brain, n=77 for breast, n=3 for cervical, n=46 for colorectal, n=20 for uterine, n=24 for esophagus, n=3 for eye, n= 26 for gastric, n=19 for head and neck, n=28 for kidney,

n=34 for leukemia, n=18 for liver, n=134 for lung, n=11 for lymphoma, n=16 for myeloma, n=9 for neuroblastoma, n=37 for ovarian, n=32 pancreatic, n=7 for prostate, n=10 for rhabdoid, n=14 for sarcoma, n=46 for skin, n=5 for thyroid. The red bar represents the mean $\pm$  SD value of DEMETER2 score. **c-f** Western blot analysis with indicated antibodies to assess MYCN or C-MYC expression after 3-day transfection of 2 different siRNAs to knockdown KDM6B in neuroblastoma cell lines. **g** Western blot analysis with indicated antibodies after BE2C cells are transduced with MSCV-KDM6B. **h** BE2C cells and KDM6B overexpressing cells were seeded at equal numbers in a 6-well plate. 5 days later, cells were stained with crystal violet. **i-l** Western blot analysis with indicated antibodies to assess MYCN or C-MYC expression after 3-day transfection of 2 different siRNA to knockdown KDM6B in lung adenocarcinoma A549 (**i**), osteosarcoma U2OS (**j**), colorectal HCT116 (**k**) and p53 null isogenic HCT116 cells (**l**). The blots are representative of three independent experiments in **c, d, e-g, i-l**.

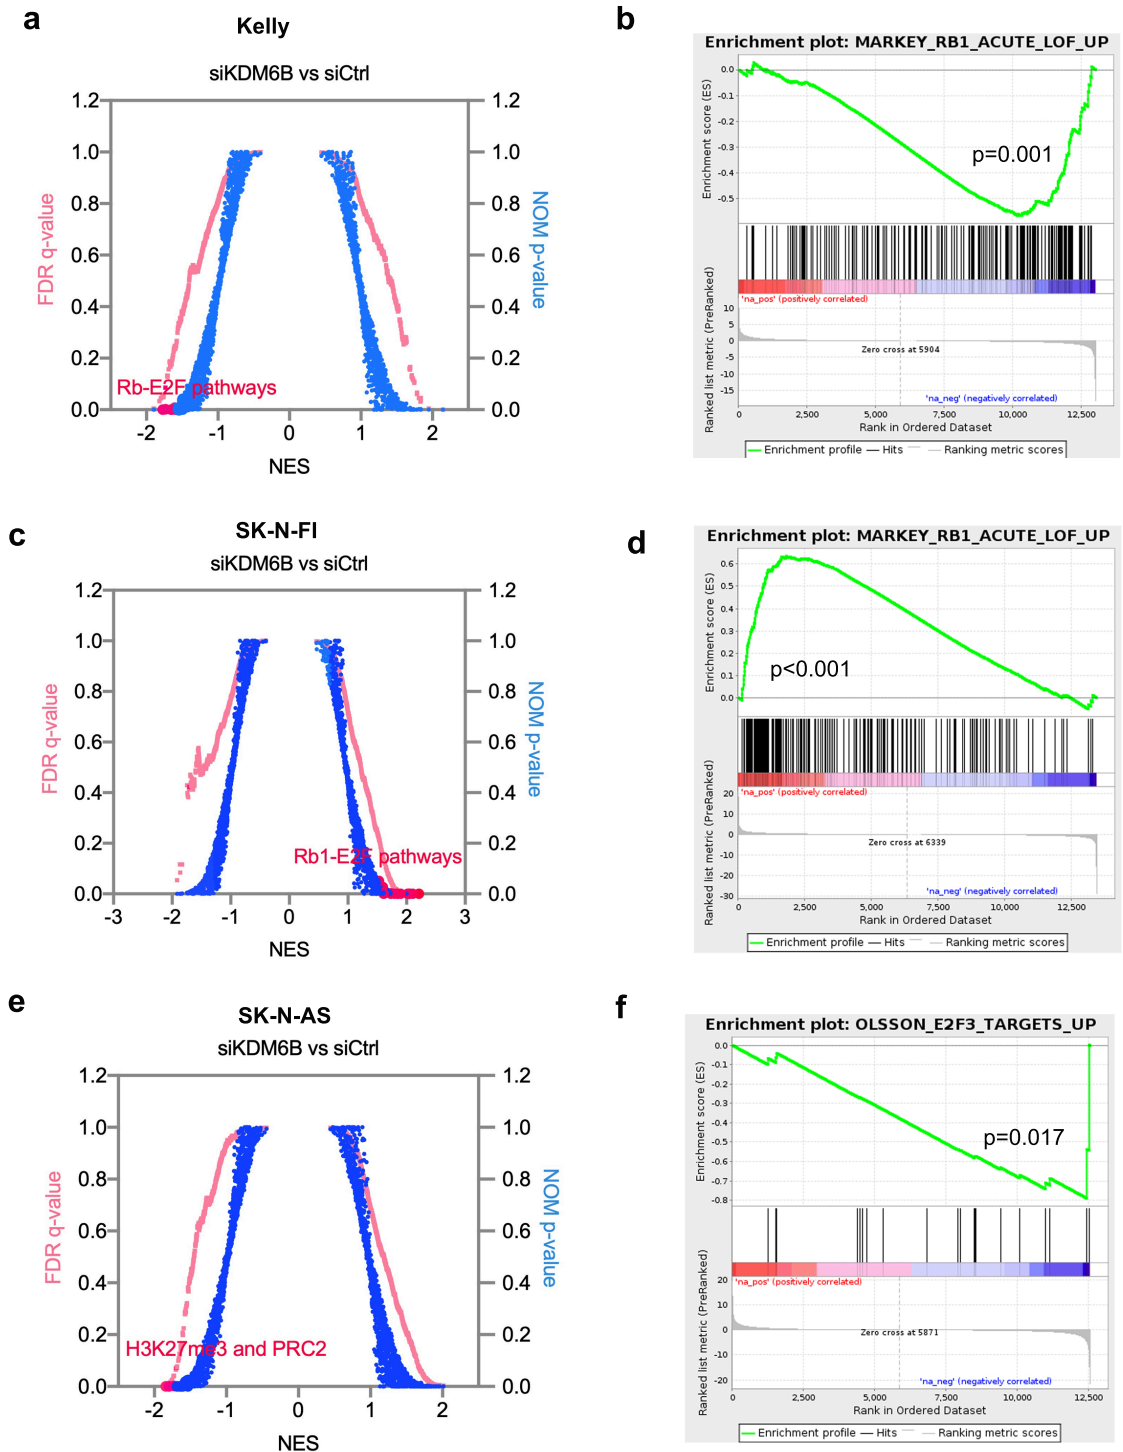

**Supplementary Fig. 4 GSEA analyses for KELLY, SK-N-FI and SK-N-AS cells.** (a, c, e) Quantitative comparison of all chemical and genetic perturbation gene sets from the MSigDB by gene set enrichment analysis (GSEA) for reduced (left) and increased (right) expression of global genes caused by KDM6B knockdown in KELLY (a), SK-N-FI (c) and SK-N-AS (e) cell lines. Data are presented as a scatterplot of normalized p value (right y-axis)/false discovery q value (left y-axis) vs normalized enrichment score

(NES) (x-axis) for each evaluated gene set. The gene sets circled in red color indicate cell cycle, pRB-E2F and MYC pathway gene sets. P value calculated by one-sided Fisher's exact test. The FDR is calculated by comparing the distribution of normalized enrichment scores from many different genesets. **(b, d, f)** Representative GSEA samples for Kelly **(b)**, SK-N-FI **(d)** and SK-N-AS **(f)**. P value calculated by one-sided Fisher's exact test. The FDR is calculated by comparing the distribution of normalized enrichment scores from many different genesets.

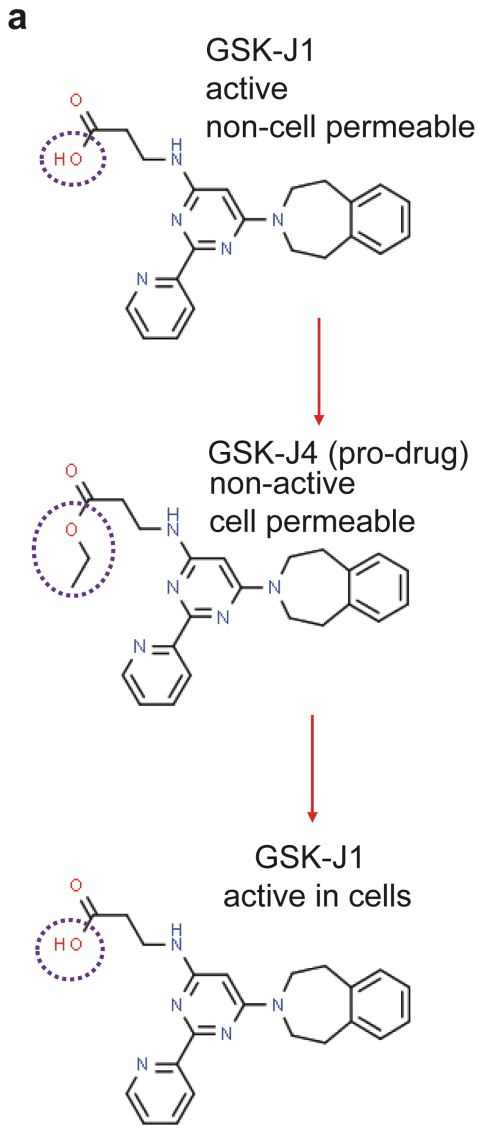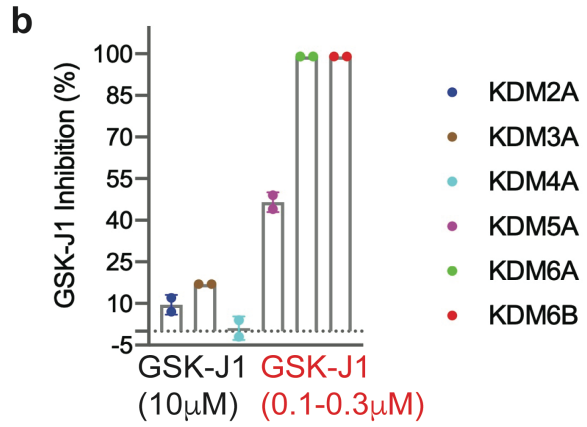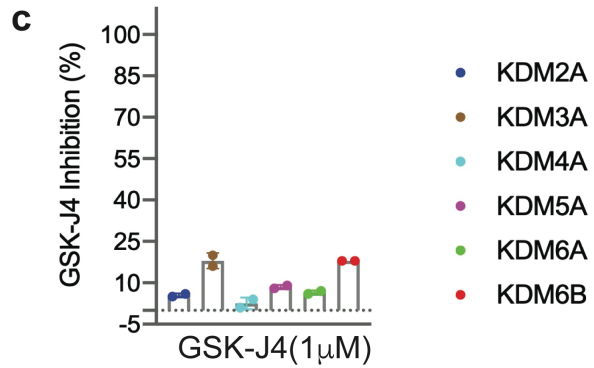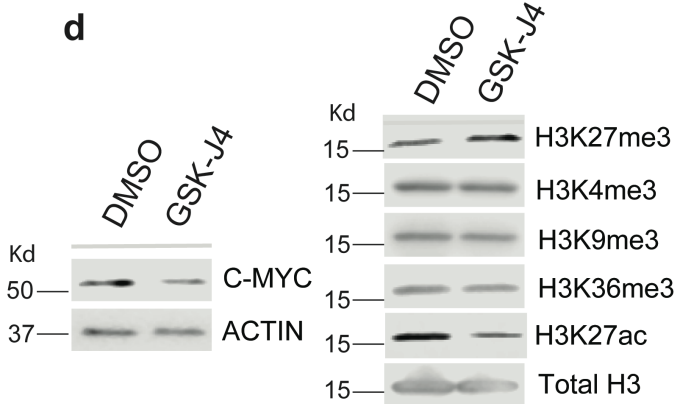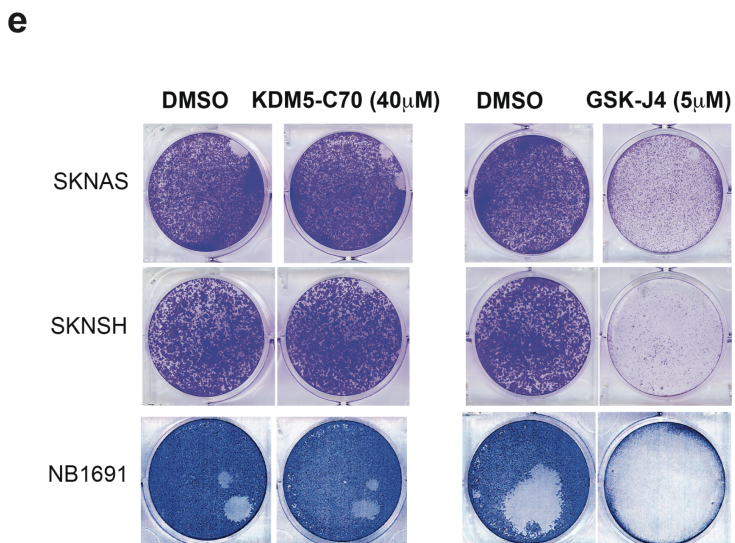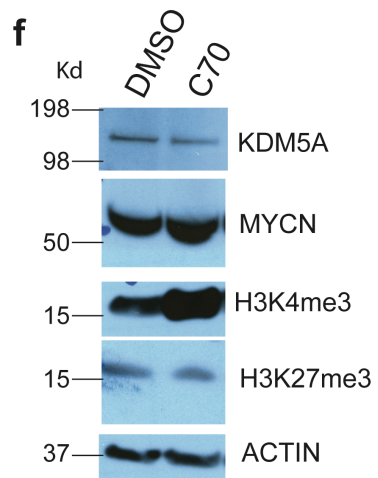



**Supplementary Fig. 5 Profiling of GSK-J1 and GSK-J4 against KDMs.** **a** GSK-J1, as a selective KDM6 inhibitor, is unable to penetrate cells. To make a cell-permeable inhibitor, GSK-J1 was modified by adding an ester (named as GSK-J4) specifically to enable efficient intracellular delivery of the compound. Once entering cells, GSK-J4 converts to GSK-J1 for inhibiting KDM6. **b, c** AlphasLISA applied to tests the inhibitory activity of GSK-J1 and GSK-J4 against purified KDMs in vitro, to validate the GSK-J1 selectivity against KDMs. 0.1  $\mu\text{M}$  of GSK-J1 for KDM6A and KDM5A, and 0.3  $\mu\text{M}$  of GSK-J1 for KDM6B.  $n=2$  for each KDM. Data are represented as mean  $\pm$  SD. **d** SK-N-AS cells were treated with GSK-J4 at 2.5 $\mu\text{M}$  for 48 hours. Cell lysates were subject to immunoblotting with indicated antibodies. The blots are representative of three independent experiments. **e** SK-N-AS, SK-N-SH and NB-1691 cells were treated with 40 $\mu\text{M}$  of KDM5-C70 or 5 $\mu\text{M}$  of GSK-J4 for 10 days, followed by crystal violet staining. **f** NB-1691 cells treated with 40 $\mu\text{M}$  of KDM5-C70 for 72 hours were subject to immunoblotting with indicated antibodies. The blots are representative of three independent experiments.

**a**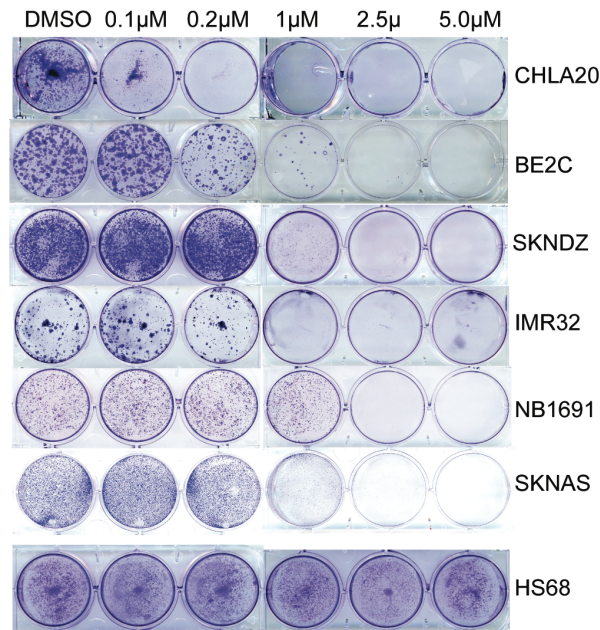**b**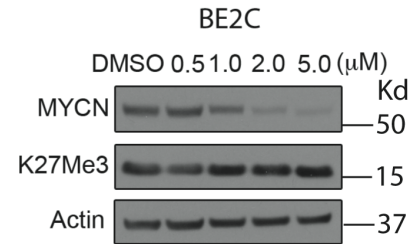**c**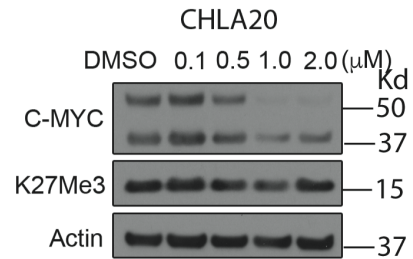**d**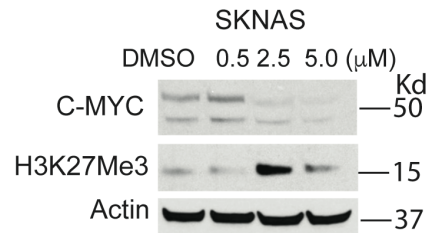

**Supplementary Fig. 6 GSK-J4 targets MYC expression.** **a** Crystal violet staining of colonies after neuroblastoma cell lines and human normal fibroblast HS68 cells were treated with different concentrations of GSK-J4 for 7 days. **b-d** Western blot analysis with indicated antibodies to assess MYCN or C-MYC and H3K27me3 expression after 48-hour treatment with GSK-J4 of BE2C (**b**), CHLA20 (**c**) and SKNAS cells (**d**). The blots are representative of three independent experiments.

a

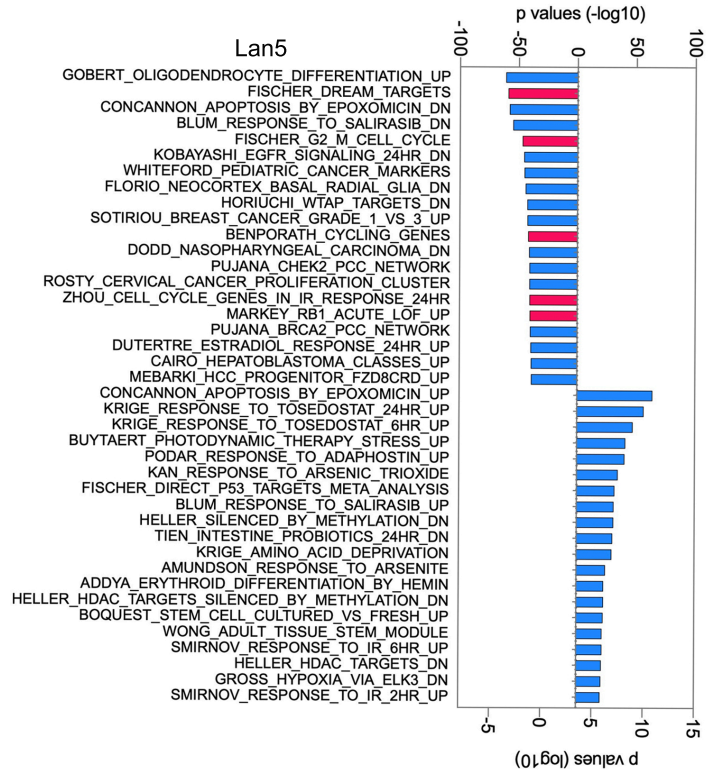

b

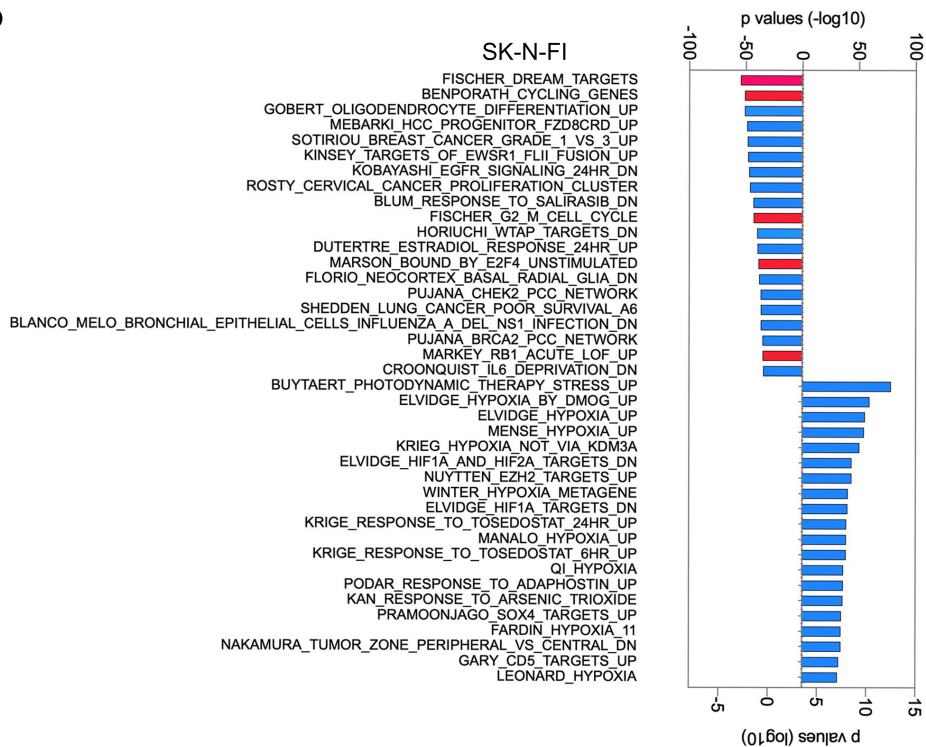

**Supplementary Fig. 7 GSK-J4 inhibits E2F pathways.** GSEA scores for the significant differentially expressed genes (downregulated and upregulated) induced by GSK-J4 in LAN5 and SK-N-FI cells<sup>41</sup> that were analyzed using GSEA online program (<https://www.gsea-msigdb.org/gsea/msigdb/annotate.jsp>) for pathway enrichment in database CGP: chemical and genetic perturbations. Red color indicates the gene sets of Rb1-E2F and cell cycle. P value calculated by one-sided Fisher's exact test.

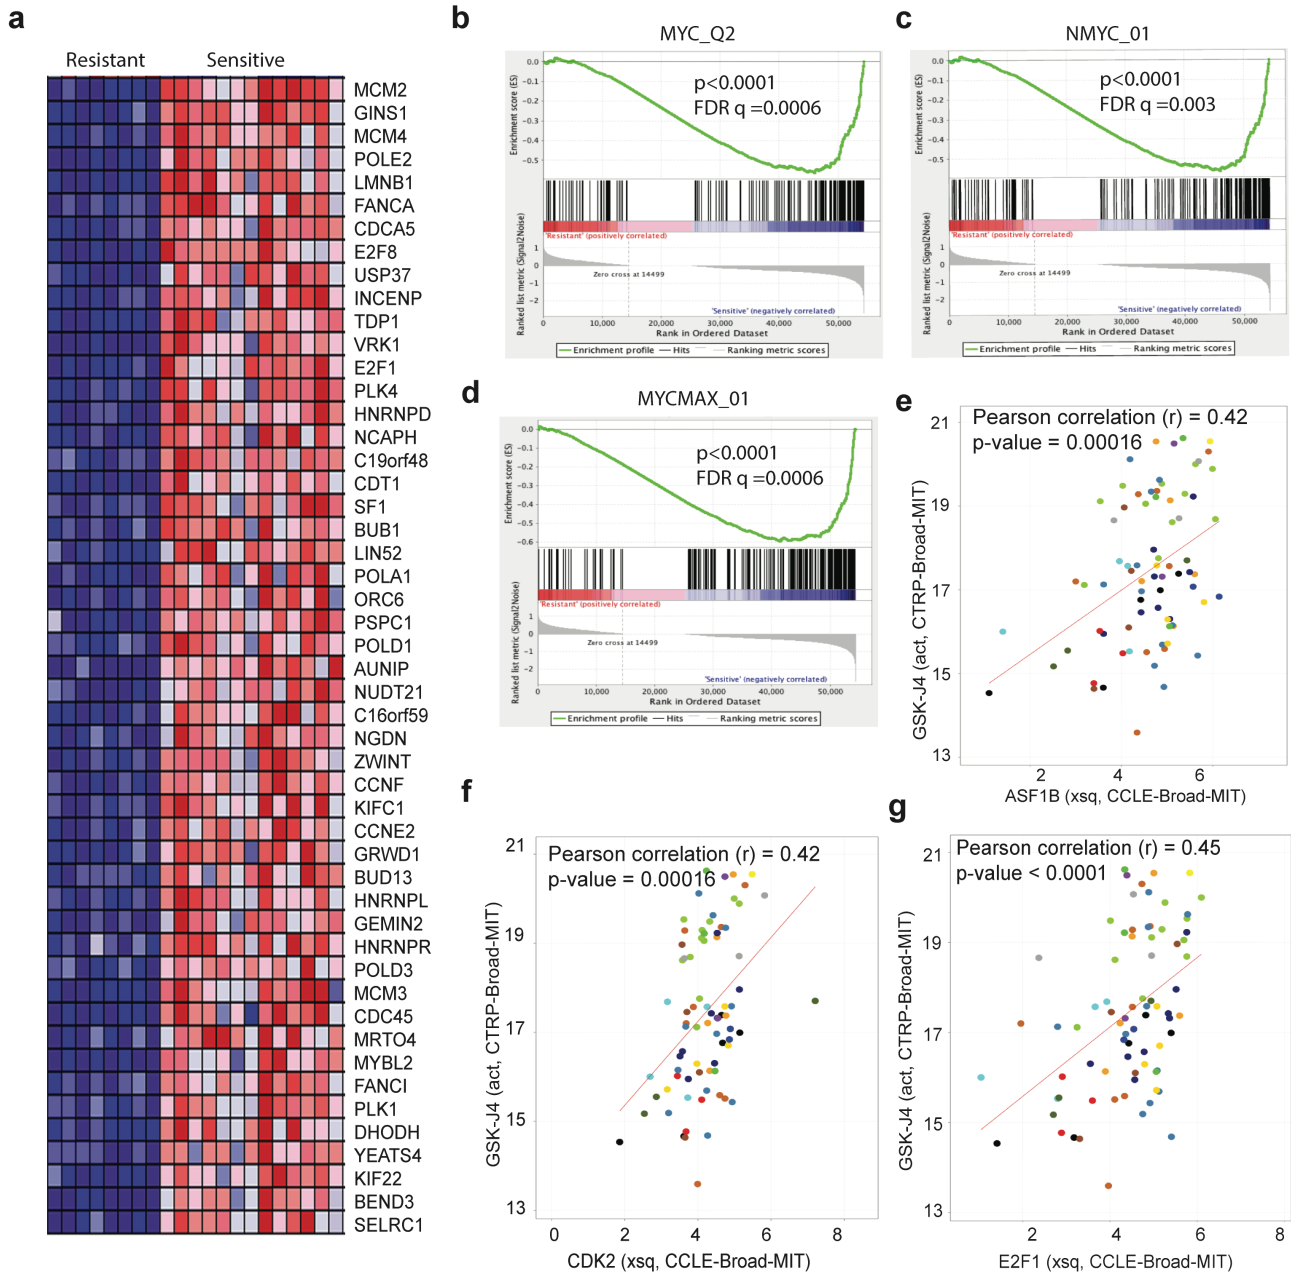

**Supplementary Fig. 8 E2F signature is associated with GSK-J4 sensitivity.** **a** The GSEA heatmap shows the top 50 genes highly expressed in GSK-J4 sensitive (group A) vs resistant (group B), after analysis of data which was extracted from The Cancer Therapeutics Response Portal (CTRP). **b-d** GSEA show that genes highly expressed in GSK-J4 sensitive (group A) cells are enriched with MYC gene sets. P value calculated by one-sided Fisher’s exact test. The FDR is calculated by comparing the distribution of normalized enrichment scores from many different genesets. **e-g** The Pearson correlation (two-tailed) of GSK-J4 with expression of E2F target genes, ASF1B(**e**), CDK2 (**f**), E2F1 (**g**), analyzed by using the online program <https://discover.nci.nih.gov/cellminerfdb/>.

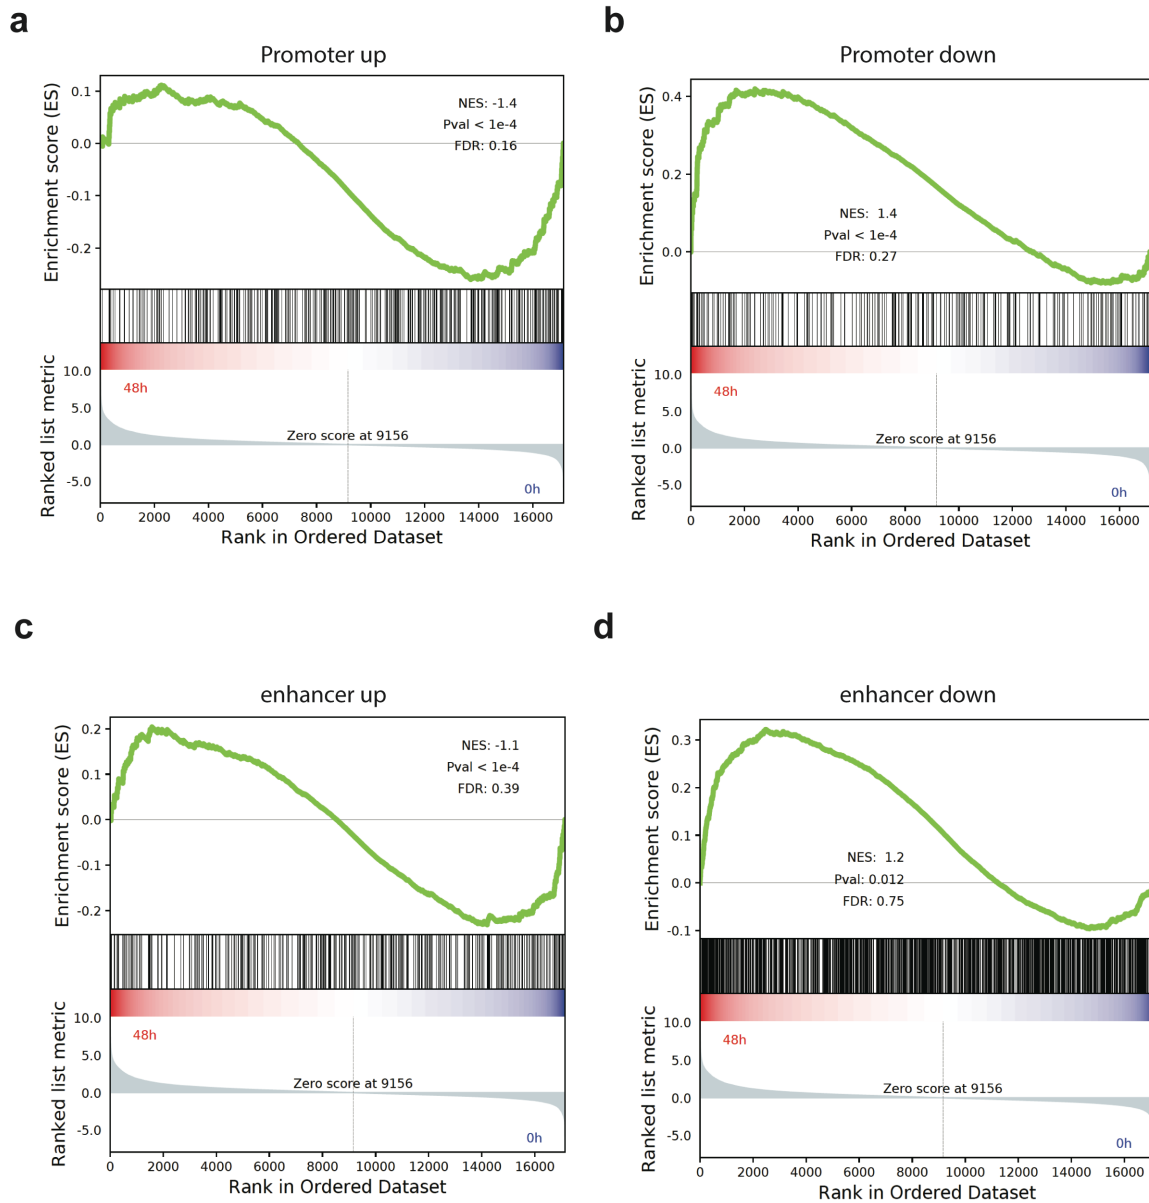

**Supplementary Fig. 9.** GSEA analysis of differentially altered chromatin accessibility regions against the gene expression data based on RNA-seq at 48h treatment by GSK-J4. P value calculated by one-sided Fisher's exact test. The FDR is calculated by comparing the distribution of normalized enrichment scores from many different genesets.

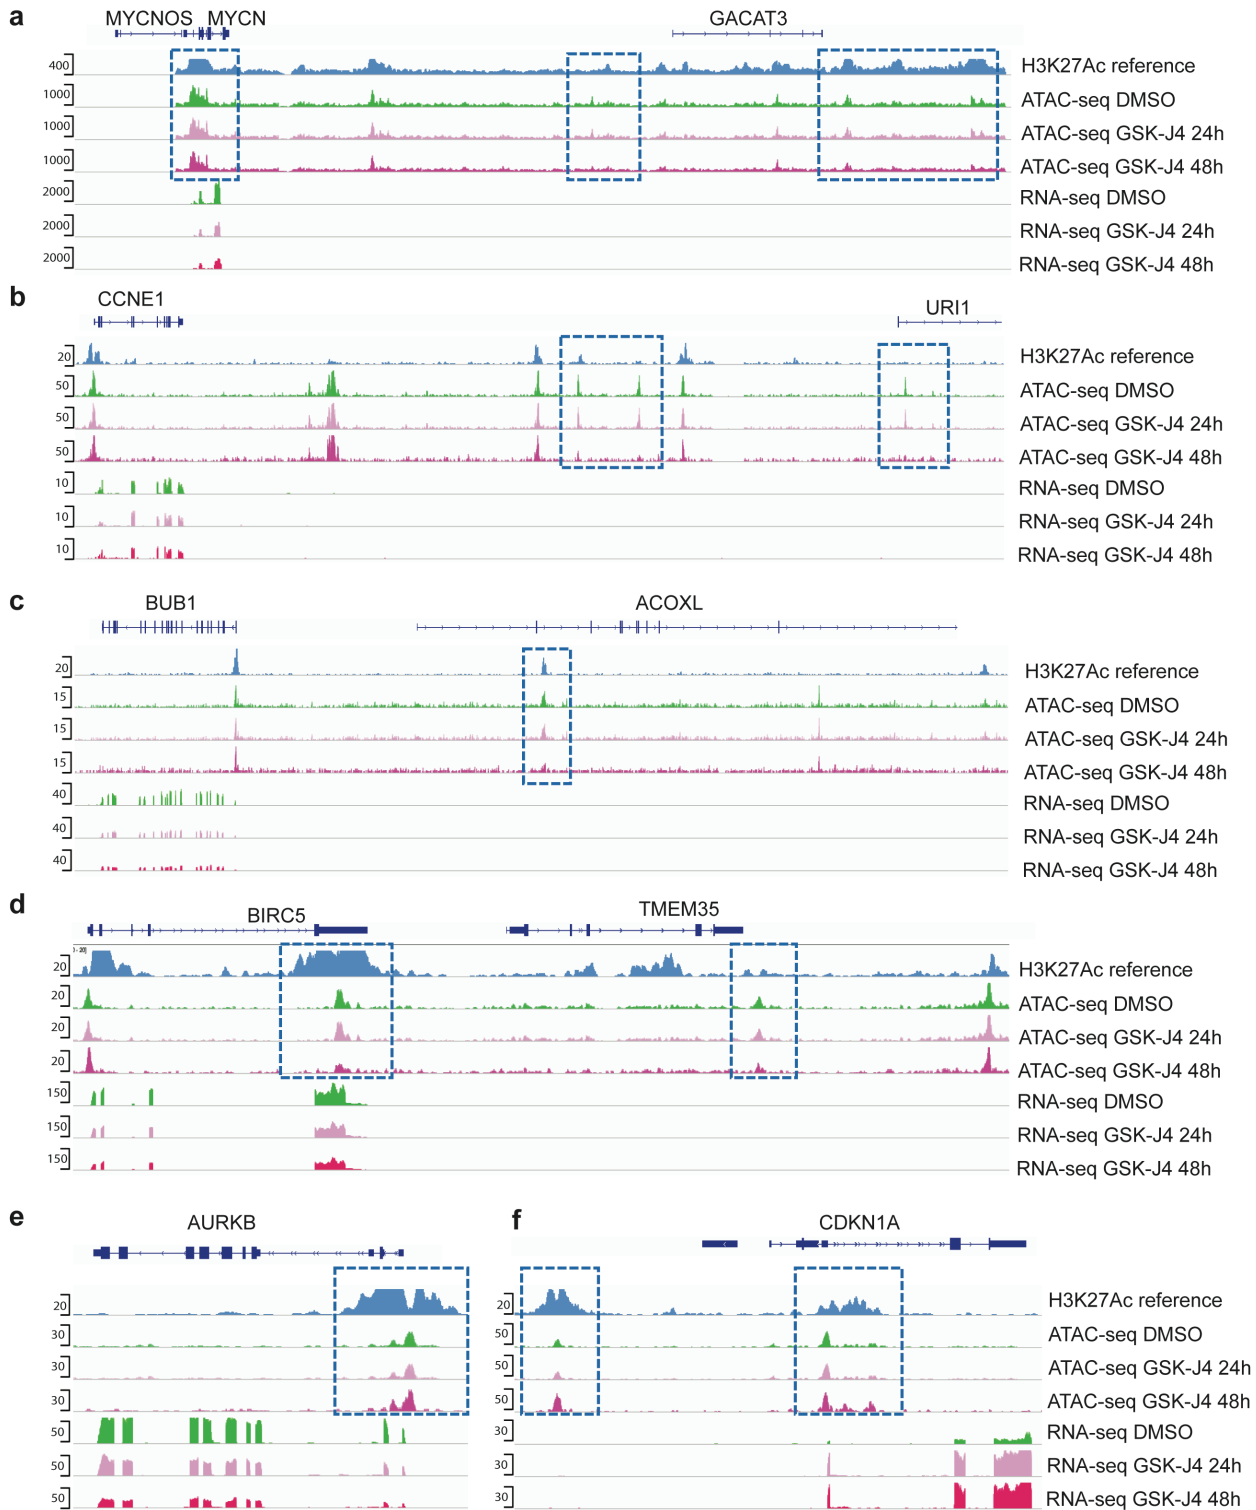

**Supplementary Fig. 10.** The ATAC-seq analysis of *MYCN* and cell cycle genes (*CCNE1*, *BUB1*, *BIRC5*, *AURKB*, *CDKN1A*) shows the alterations of DNA accessibility at their promoter and distal enhancer regions by GSK-J4 treatment for 24h and 48h. RNA-seq data analysis shows the RNA reads effected by GSK-J4 treatment for 24h and 48h.

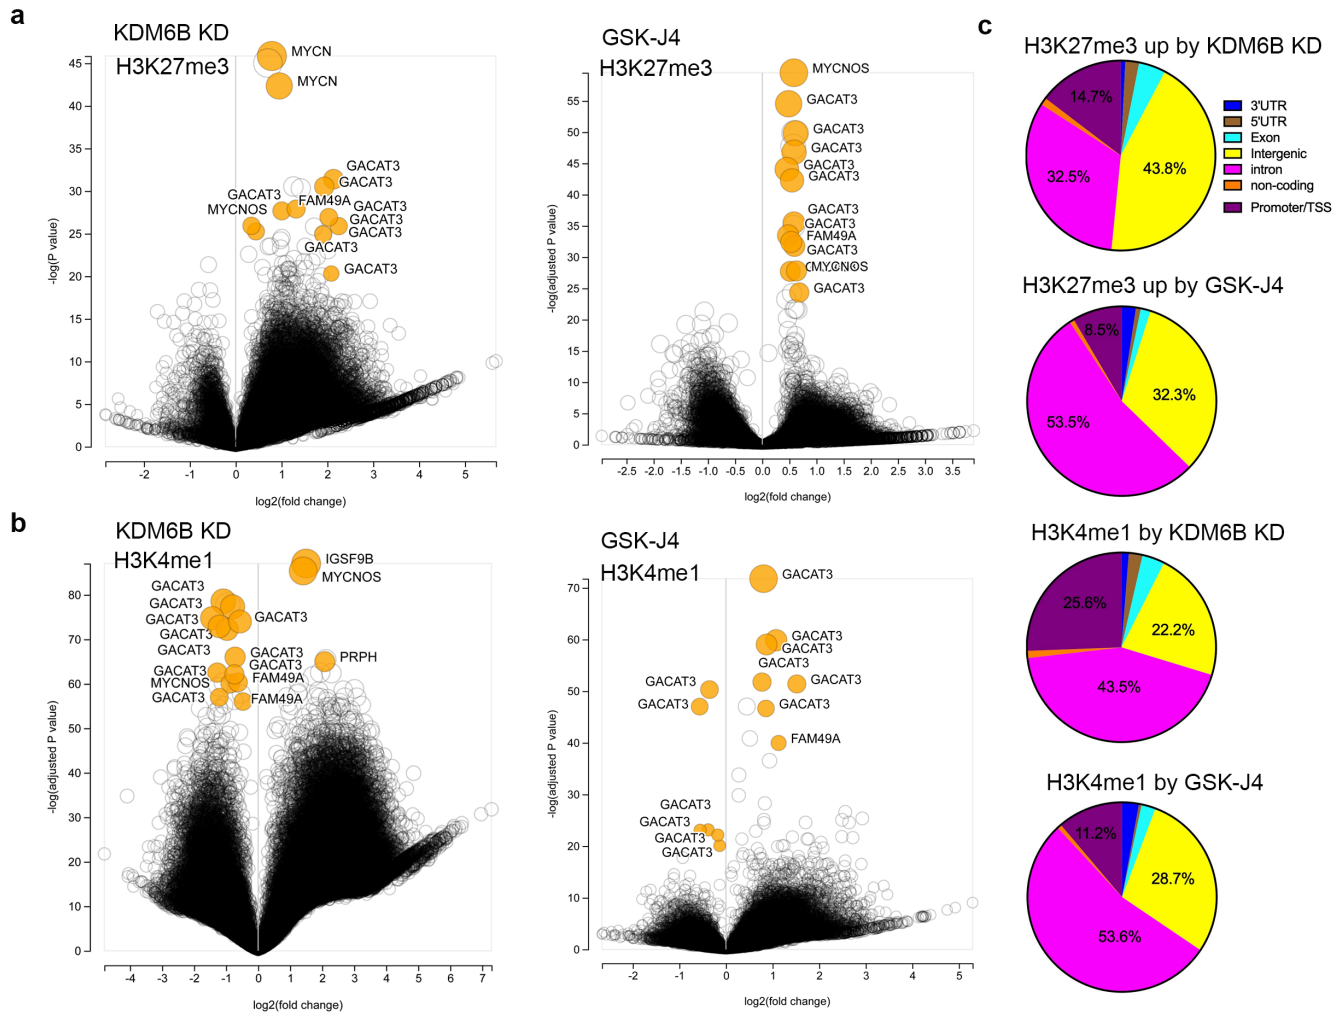

**Supplementary Fig. 11. Impact of epigenetic marks by KDM6B inhibition.** **a, b** Volcano plot showing differential peaks of H3K27me3 (**a**) and H3K4me1 (**b**) induced by KDM6B knockdown and GSK-J4 treatment of BE2C cells. The yellow color highlights the super-enhancer region of *MYCN*, *GACAT3* locus. The y-axis indicates p value. The x-axis indicates fold change. The p-value is obtained from the limma moderated t-statistic, two-sided. **c** Pie plot showing the percentage of H3K27me3 upregulated by KDM6B inhibition and global H3K4me1 at distinct genomic regions.

**a**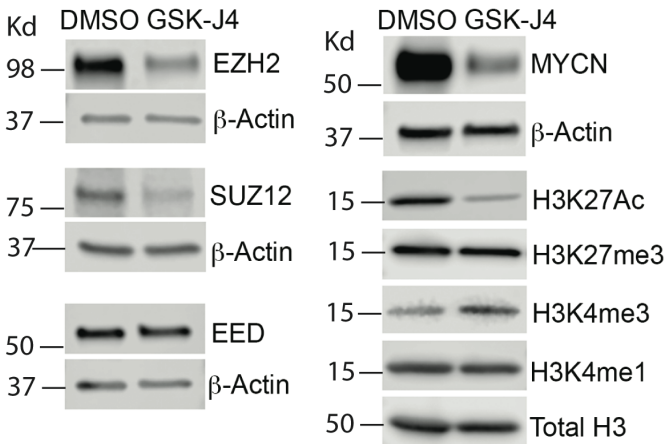**b**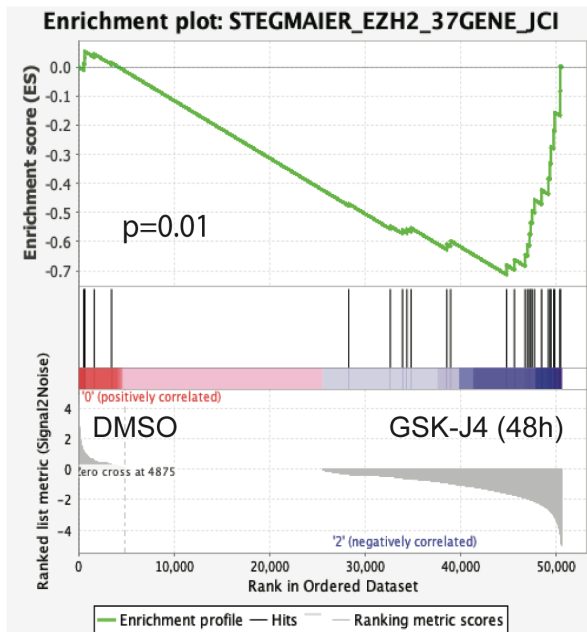**c**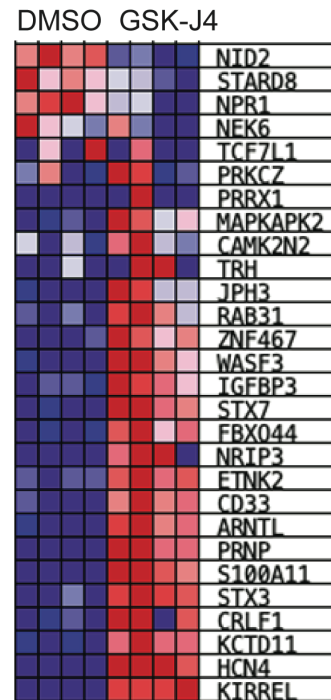

**Supplementary Fig. 12 GSK-J4 downregulates the expression of PRC2 complex.** **a** Western blot analysis with indicated antibodies to assess PRC2 complex, MYCN and histone modification mark expression after 48-hour treatment with 2.5 $\mu$ M of GSK-J4 of BE2C. The blots are representative of three independent experiments. **b** GSEA analysis of EZH2 signature against the gene expression data based on RNA-seq at 48h treatment by GSK-J4. P value calculated by one-sided Fisher's exact test. **c** Heatmap of the 37-gene signature from **c**.



**a**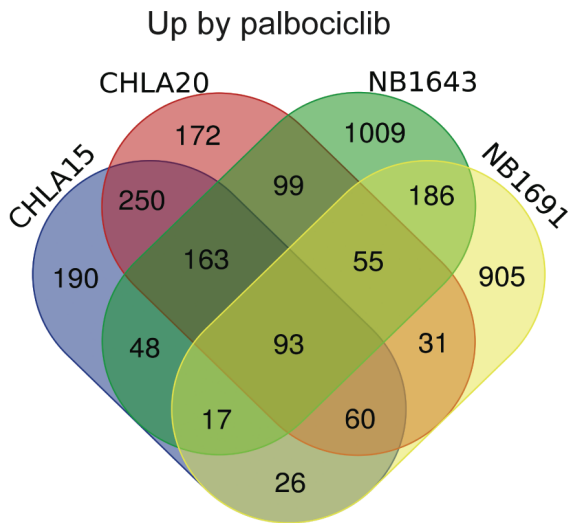**b**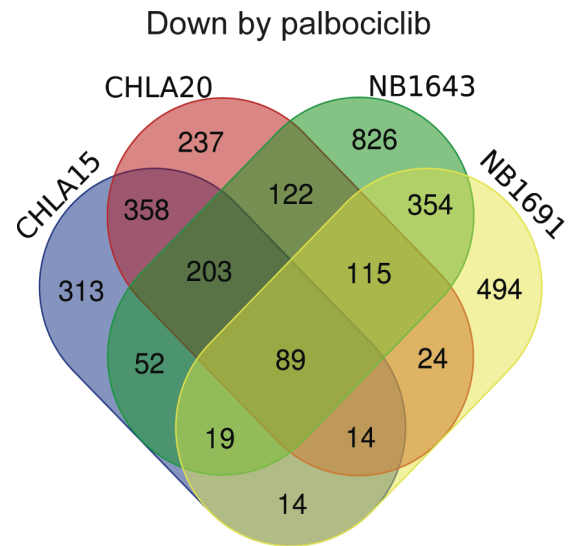

**Supplementary Fig. 13 Common genes down regulated and upregulated by palbociclib.** Four neuroblastoma cell lines were treated with palbociclib for RNA-seq. The differentially expressed genes in each cell line were analyzed by using Venn program to find the commonly upregulated (**a**) or downregulated genes (**b**)

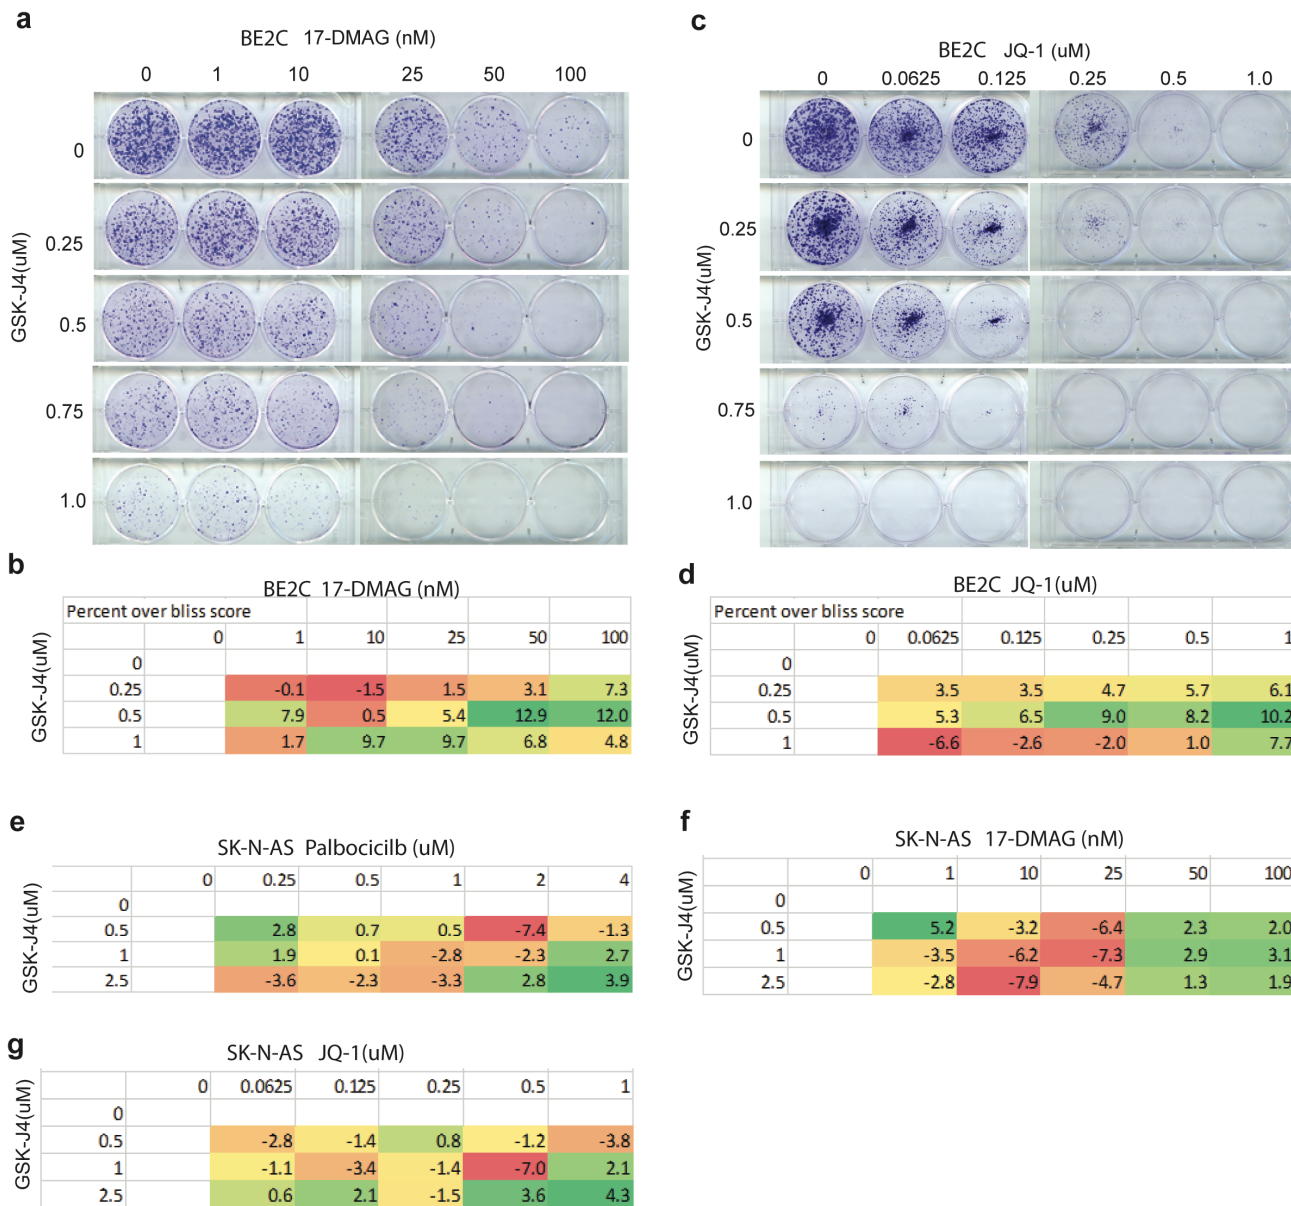

**Supplementary Fig. 14 KDM6 inhibition is synergistic with non-CDK4/6 inhibitors.** **a** BE2C cells were seeded with low numbers in 6-well plate and treated with different concentrations of GSK-J4 or/and 17-DMAG for 7 days. The cell colonies were stained with crystal violet. **b** Bliss index for combination of GSK-J4 and 17-DMAG in BE2C cells. Positive scores indicate synergy, negative scores indicate antagonism. **c** BE2C cells were seeded with low numbers in 6-well plate and treated with different concentrations of GSK-J4 or/and JQ-1 for 7 days. The cell colonies were stained with crystal violet. **d** Bliss index for combination of GSK-J4 and JQ-1 in BE2C cells. Positive scores indicate synergy, negative scores indicate antagonism. **e** Bliss index for combination of GSK-J4 and palbociclib in SK-N-AS cells. Positive scores indicate synergy, negative scores indicate antagonism. **f** Bliss index for combination of

GSK-J4 and 17-DMAG in SK-N-AS cells. Positive scores indicate synergy, negative scores indicate antagonism. **g** Bliss index for combination of GSK-J4 and JQ-1 in SK-N-AS cells. Positive scores indicate synergy, negative scores indicate antagonism.

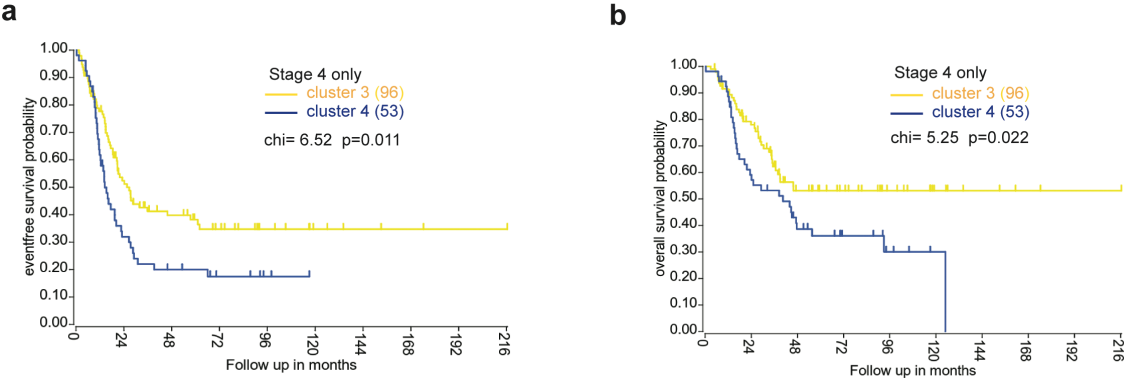

**Supplementary Fig. 15** Kaplan-Meier curve using Log-Rank method shows the event-free survival and overall survival of clusters 3 and 4 with stage 4 disease.

**Supplementary Table 1. Cell lines related to Fig. 3b.**

|                        |                                            |
|------------------------|--------------------------------------------|
| <b>Resistant cells</b> | KYSE30_OESOPHAGUS                          |
|                        | TUHR14TKB_KIDNEY                           |
|                        | BICR56_UPPER_AERODIGESTIVE_TRACT           |
|                        | HS940T_FIBROBLAST                          |
|                        | HS688AT_FIBROBLAST                         |
|                        | KMRC3_KIDNEY                               |
|                        | KG1C_CENTRAL_NERVOUS_SYSTEM                |
|                        | HS822T_FIBROBLAST                          |
| <b>Sensitive cells</b> | KASUMI2_HAEMATOPOIETIC_AND_LYMPHOID_TISSUE |
|                        | HGC27_STOMACH                              |
|                        | KYM1_SOFT_TISSUE                           |
|                        | COV434_OVARY                               |
|                        | DMS53_LUNG                                 |
|                        | A204_SOFT_TISSUE                           |
|                        | KMBC2_URINARY_TRACT                        |
|                        | T84_LARGE_INTESTINE                        |
|                        | MDAMB453_BREAST                            |
|                        | DMS114_LUNG                                |
|                        | KE39_STOMACH                               |
|                        | SKNBE2_AUTONOMIC_GANGLIA                   |
|                        | SNU216_STOMACH                             |

**Supplementary Table 2. Transcription factor motif (TFT) for group A cells in Fig. 3b.**

Gene set enrichment scores analyzed by GSEA program. ES= enrichment score, NES = normalized enrichment score, NOM P-val = nominal p value. FDR =false discovery rate. P value calculated by one-sided Fisher's exact test. The FDR is calculated by comparing the distribution of normalized enrichment scores from many different genesets.

|    | <b>Gene sets</b>     | <b>ES</b> | <b>NES</b> | <b>NOM p-val</b> | <b>FDR q-val</b> |
|----|----------------------|-----------|------------|------------------|------------------|
| 1  | E2F_Q3               | -0.73     | -2.27      | 0                | 0                |
| 2  | E2F_Q4_01            | -0.74     | -2.24      | 0                | 0                |
| 3  | E2F_Q6_01            | -0.71     | -2.24      | 0                | 0                |
| 4  | E2F1_Q6              | -0.77     | -2.23      | 0                | 0                |
| 5  | E2F1_Q3              | -0.76     | -2.23      | 0                | 0                |
| 6  | E2F1_Q4_01           | -0.72     | -2.23      | 0                | 0                |
| 7  | E2F1_Q6_01           | -0.76     | -2.22      | 0                | 0                |
| 8  | E2F_Q3_01            | -0.72     | -2.22      | 0                | 0                |
| 9  | SGCGSSAAA_E2F1DP2_01 | -0.78     | -2.21      | 0                | 0                |
| 10 | E2F1DP1_01           | -0.75     | -2.21      | 0                | 0                |
| 11 | E2F1DP2_01           | -0.75     | -2.21      | 0                | 0                |
| 12 | E2F4DP2_01           | -0.75     | -2.21      | 0                | 0                |
| 13 | E2F4DP1_01           | -0.75     | -2.21      | 0                | 0                |
| 14 | E2F_03               | -0.72     | -2.21      | 0                | 0                |
| 15 | E2F_Q6               | -0.76     | -2.21      | 0                | 0                |
| 16 | E2F_02               | -0.75     | -2.2       | 0                | 0                |
| 17 | E2F_Q4               | -0.75     | -2.19      | 0                | 0                |
| 18 | E2F1DP1RB_01         | -0.73     | -2.19      | 0                | 0                |
| 19 | KTGGYRSGAA_UNKNOWN   | -0.71     | -2.17      | 0                | 0                |
| 20 | E2F_01               | -0.76     | -2.15      | 0                | 0                |
| 21 | E2F1_Q4              | -0.66     | -2.11      | 0                | 0                |

**Supplementary Table 3. Transcription factor binding motif enrichment for neuroblastoma cells sensitive to GSK-J4.** Gene set enrichment scores analyzed by GSEA program. ES= enrichment score, NES = normalized enrichment score, NOM P-val = nominal p value. FDR =false discovery rate. P value calculated by one-sided Fisher's exact test. The FDR is calculated by comparing the distribution of normalized enrichment scores from many different genesets.

|    | <b>Gene Sets</b>        | <b>NES</b> | <b>NOM p-val</b> | <b>FDR q-val</b> |
|----|-------------------------|------------|------------------|------------------|
| 1  | E2F_Q6                  | 1.89019    | 0.00000          | 0.00000          |
| 2  | E2F_Q4                  | 1.86916    | 0.00000          | 0.00112          |
| 3  | E2F4DP2_01              | 1.84061    | 0.00000          | 0.00075          |
| 4  | E2F_02                  | 1.83652    | 0.00000          | 0.00112          |
| 5  | E2F1DP1_01              | 1.83527    | 0.00000          | 0.00090          |
| 6  | E2F1_Q6                 | 1.83142    | 0.00000          | 0.00075          |
| 7  | E2F1DP2_01              | 1.83124    | 0.00000          | 0.00064          |
| 8  | E2F1_Q3                 | 1.82484    | 0.00000          | 0.00056          |
| 9  | E2F1DP1RB_01            | 1.80926    | 0.00000          | 0.00050          |
| 10 | E2F4DP1_01              | 1.80680    | 0.00000          | 0.00045          |
| 11 | E2F_Q3_01               | 1.80364    | 0.00000          | 0.00041          |
| 12 | E2F_03                  | 1.79745    | 0.00000          | 0.00064          |
| 13 | SGCGSSAAA_E2F1DP2_01    | 1.79145    | 0.00000          | 0.00076          |
| 14 | E2F1_Q4_01              | 1.77454    | 0.00000          | 0.00125          |
| 15 | E2F_Q4_01               | 1.77275    | 0.00000          | 0.00117          |
| 16 | E2F_Q6_01               | 1.71608    | 0.00000          | 0.00258          |
| 17 | E2F1_Q6_01              | 1.67011    | 0.00000          | 0.00468          |
| 18 | E2F_Q3                  | 1.66943    | 0.00000          | 0.00448          |
| 19 | KRCTCNNNNMANAGC_UNKNOWN | 1.63733    | 0.00184          | 0.00603          |
| 20 | NRF1_Q6                 | 1.55445    | 0.00000          | 0.01859          |
| 21 | NRSF_01                 | 1.54447    | 0.00000          | 0.01968          |
| 22 | TMTCGCGANR_UNKNOWN      | 1.52952    | 0.00000          | 0.02146          |
| 23 | CAGNWMCNNGAC_UNKNOWN    | 1.52403    | 0.00000          | 0.02186          |
| 24 | ACTAYRNNNCCCR_UNKNOWN   | 1.51553    | 0.00000          | 0.02396          |
| 25 | MCAATNNNNNGCG_UNKNOWN   | 1.51439    | 0.00372          | 0.02336          |

**Supplementary Table 4. Genes downregulated by KDM6B KD related to Fig. 6a.**

| Description | log 2 (FC) | Description | log 2 (FC) | Description | log 2 (FC) | Description | log 2 (FC) | Description | log 2 (FC) | Description | log 2 (FC) |
|-------------|------------|-------------|------------|-------------|------------|-------------|------------|-------------|------------|-------------|------------|
| DBH         | 2.321632   | TK1         | 1.137371   | ASAP1       | 0.964286   | HMB5        | 0.864758   | B3GALT2     | 0.783497   | HPRT1       | 0.732571   |
| FAM1118     | 2.211132   | NCS1        | 1.137318   | BNIP3       | 0.963785   | COL6A6      | 0.8639975  | DLL3        | 0.7830965  | CAMKK1      | 0.731661   |
| ADGRG2      | 2.060494   | TAGLN2      | 1.1365735  | RFK         | 0.963643   | ST3GAL4     | 0.86233    | KCNA3       | 0.782769   | SLC2A6      | 0.7314655  |
| RTL1        | 1.950828   | PPP1R16B    | 1.135968   | LRRTM1      | 0.9628975  | PSMD11      | 0.8599885  | ZFP36       | 0.782336   | CIART       | 0.7305685  |
| CD9         | 1.925528   | NETO2       | 1.135297   | LGR5        | 0.96257    | SLC2A6      | 0.859512   | GTSE1       | 0.782211   | CBWD6       | 0.7292315  |
| OAS1        | 1.8900065  | MID1        | 1.1349535  | RHOB        | 0.9624545  | EBAG9       | 0.859349   | GP1BB       | 0.781957   | RFC2        | 0.7288095  |
| GNL2        | 1.836948   | S1PR1       | 1.133851   | SLIT3       | 0.9622515  | SVT9        | 0.859347   | CCP110      | 0.781763   | ITGA9       | 0.7288065  |
| KDM6B       | 1.8246645  | ESCO2       | 1.1333755  | MYB         | 0.9621145  | HUURP       | 0.8593015  | SMCO4       | 0.781604   | NUSAP1      | 0.727813   |
| ASS1        | 1.7042745  | CDK2        | 1.133259   | PFN2        | 0.960925   | SLCGA17     | 0.858509   | KCNH4       | 0.7806445  | POLA1       | 0.7273485  |
| ACE         | 1.7006315  | GSTT2       | 1.1321125  | CLVS1       | 0.9587585  | MIF4G       | 0.8575665  | TCF3        | 0.780139   | TCF7L2      | 0.7271315  |
| CACNG4      | 1.667475   | EXOSC1      | 1.1308815  | AS3MT       | 0.9583305  | ATAD2       | 0.856628   | MIR6809     | 0.779837   | DNAAF5      | 0.727124   |
| CCNE2       | 1.6435515  | ARHGAP29    | 1.125485   | TLCD1       | 0.9577255  | OSBPL3      | 0.85603    | FAM105A     | 0.7789145  | BORA        | 0.7269125  |
| OLFM1       | 1.6381345  | CEP295NL    | 1.124688   | B3GALNT1    | 0.9570825  | HMB5        | 0.855616   | Cl1orf24    | 0.7782945  | SYN2        | 0.7268225  |
| CIQL1       | 1.6323405  | PAPOLA      | 1.122019   | ISYNA1      | 0.9567885  | POLD3       | 0.8555495  | PLEKHA6     | 0.778292   | IDH2        | 0.726172   |
| SH3BGR1     | 1.5694855  | NTAN1       | 1.11968    | HIST1H4I    | 0.9552375  | STK17B      | 0.853299   | NDC80       | 0.7782305  | EIF2B2      | 0.7258495  |
| ADGRG1      | 1.550942   | MTMR6       | 1.111176   | MYBL2       | 0.954745   | FABP5       | 0.8517465  | ARHGAP42    | 0.7780475  | NR2C2AP     | 0.725077   |
| CLSPN       | 1.5505425  | BEGAIN      | 1.1093     | DHFR        | 0.954631   | PWP2        | 0.849862   | ZWINT       | 0.777092   | CD3EAP      | 0.722806   |
| ZMAT4       | 1.548271   | ITPR1PL1    | 1.106137   | CARHSP1     | 0.954499   | DLGAP5      | 0.8496545  | AIFM2       | 0.776263   | FANCI       | 0.722727   |
| CHRM1       | 1.546421   | TUBB3       | 1.1050985  | RADS1       | 0.9543475  | RNASEH2B    | 0.8493805  | CENPA       | 0.774866   | SLCO3A1     | 0.722494   |
| ASCL1       | 1.504814   | CENPW       | 1.1012415  | RD3         | 0.953663   | HIST1H2BI   | 0.8477665  | FOXRED2     | 0.7743005  | DDAH1       | 0.720853   |
| PLPP4       | 1.5006365  | PRR11       | 1.0977845  | ALKBH5      | 0.953464   | LRFN2       | 0.847708   | ZCCHC10     | 0.7734935  | FUZ         | 0.7205335  |
| LSM6        | 1.4959865  | CDCA28PA    | 1.095631   | CENPI       | 0.9531245  | TRMU        | 0.847394   | EFCAB10     | 0.77289    | CD151       | 0.7199095  |
| DRD2        | 1.4847435  | RAB30       | 1.092287   | SLC2A6      | 0.952743   | HIST1H2BE   | 0.845258   | MIR17H8     | 0.772691   | HAUS1       | 0.7195635  |
| S100A11     | 1.4830285  | TPM1        | 1.08898    | EZR         | 0.952128   | HIST1H3F    | 0.8440505  | CNA2        | 0.7723315  | LPACT2      | 0.7194905  |
| RELL1       | 1.458951   | DSEL        | 1.088601   | MRM1        | 0.951594   | SS18        | 0.844034   | NUDCD1      | 0.7723295  | FARP1       | 0.7192205  |
| PCDH19      | 1.4581215  | C8orf88     | 1.0848885  | WHDH1       | 0.9501385  | CKN2C       | 0.843517   | DDX39A      | 0.7721355  | LPAR3       | 0.7187545  |
| FAM167A     | 1.458081   | RPHA3       | 1.084791   | KCNH5       | 0.948129   | OGFRL1      | 0.8424345  | FBXO33      | 0.771985   | CCNB2       | 0.7187045  |
| TSPAN18     | 1.452157   | GLIPR2      | 1.08398    | HIST1H2AB   | 0.94807    | UBE2T       | 0.8417225  | HIST1H4D    | 0.771535   | DHRS11      | 0.7184735  |
| TRPA1       | 1.442992   | PLCB3       | 1.0823785  | CASP7       | 0.9458635  | THAP10      | 0.841529   | MXM4        | 0.771309   | ACTN4       | 0.7183585  |
| CYB5E1      | 1.4197795  | HIST1H1D    | 1.080605   | CHAC2       | 0.9443185  | KCNH2       | 0.841467   | FOXM1       | 0.7705755  | HGFRRP3     | 0.718223   |
| EGR1        | 1.4148115  | SFXN3       | 1.080087   | SLC29A1     | 0.9430425  | ENDOG       | 0.8396315  | CSR1P1      | 0.770482   | FAM103A1    | 0.7156825  |
| DDC         | 1.4067025  | PPP2R2B     | 1.0777015  | SLC20A1     | 0.9411075  | LIFR        | 0.8396285  | KLf6        | 0.769967   | ADRA2       | 0.7155855  |
| ADAMTS1     | 1.401651   | LOXL1       | 1.0775     | NCKAP1      | 0.940983   | MZT1        | 0.8384925  | MED15       | 0.7687735  | THSD7A      | 0.7143555  |
| ATF3        | 1.39639    | DSE         | 1.076164   | Clorf21     | 0.939349   | GATA2       | 0.8363735  | SYNPO       | 0.767908   | EMC8        | 0.7114695  |
| FXYD6       | 1.391147   | VGF         | 1.074699   | LTA4H       | 0.9381635  | ODAM        | 0.835778   | CDCA7       | 0.767407   | CENPK       | 0.7112845  |
| HGF         | 1.3783205  | CORO1A      | 1.0743285  | E2F7        | 0.9378295  | PRIM1       | 0.835587   | CNTFR       | 0.767388   | ITGA6       | 0.710897   |
| LPGAT1      | 1.377573   | MMD         | 1.0737455  | HIST1H3I    | 0.937742   | FAM72A      | 0.835125   | MSH6        | 0.7673295  | MYCN        | 0.71007    |
| PARM1       | 1.358232   | NCPAG       | 1.071829   | EXOSC7      | 0.9374075  | MASTL       | 0.835066   | CDCO2       | 0.767083   | H2AFX       | 0.710038   |
| RIMS3       | 1.355447   | NR1D2       | 1.0714375  | MARCK4      | 0.934672   | LRR1        | 0.8343785  | TRIM5       | 0.7666695  | LIG1        | 0.7099835  |
| E2F8        | 1.354234   | FEN1        | 1.071426   | CENPE       | 0.934277   | ALCAM       | 0.8316485  | GRM19       | 0.7662365  | ST8SIA2     | 0.7099395  |
| CHST11      | 1.3470885  | ADCYAP1     | 1.0713965  | VTI1B       | 0.9326895  | HE51        | 0.8299475  | RNF138      | 0.7661765  | ENPP2       | 0.7097335  |
| SLC18A1     | 1.3455875  | KIF20A      | 1.0709125  | CNN3        | 0.931465   | MSI2        | 0.8297345  | SLC2A6      | 0.7645365  | SH3RF1      | 0.7094135  |
| HTR3A       | 1.344718   | FBXO5       | 1.0696375  | CDKN3       | 0.931385   | VAR5        | 0.8282165  | KDELR3      | 0.764033   | SYT4        | 0.708528   |
| GRIK3       | 1.3440255  | HIST1H2BI   | 1.069534   | EAF1        | 0.930857   | PTGER2      | 0.828158   | HACD1       | 0.763019   | DNA2        | 0.7078805  |
| GABRA4      | 1.340389   | HIST2H3A    | 1.068472   | CAMKV       | 0.9292875  | MAGI1       | 0.827905   | CALM3       | 0.7626735  | SYNPO2      | 0.7058915  |
| CORO2A      | 1.3199035  | WDR76       | 1.0669695  | FUNDC1      | 0.928694   | GPATCH4     | 0.827681   | ETS2        | 0.7612885  | ANP32E      | 0.705295   |
| SPRY4       | 1.313135   | NRG1        | 1.066745   | HIST1H3G    | 0.9280345  | KCNT1       | 0.8274855  | CRABP2      | 0.7610885  | CHGA        | 0.7040255  |
| ENTPD3      | 1.312376   | CLN6        | 1.057853   | HEG1        | 0.9273205  | DUSP7       | 0.8273865  | COL10A1     | 0.7608495  | NR2F2       | 0.70384    |
| CRIP1       | 1.3078695  | GPR3        | 1.0517225  | DSN1        | 0.926089   | PCBP4       | 0.827072   | 5-Mar       | 0.7606535  | CRABP1      | 0.703754   |
| PPEF1       | 1.306663   | HIST1H3B    | 1.0510495  | PHLDA1      | 0.925801   | SPIN4       | 0.8262735  | RPA3        | 0.760497   | SHC1        | 0.702837   |
| HIGD1C      | 1.3061335  | KCNQ2       | 1.0509405  | H565T1      | 0.924628   | LAMP5       | 0.82597    | PLAT        | 0.760285   | HIST1H2AJ   | 0.702205   |
| DGKK        | 1.3045375  | HIST1H2AE   | 1.0494565  | CREB5       | 0.924266   | FAM26E      | 0.8254605  | KCNH6       | 0.7583625  | TMED5       | 0.701647   |
| TFDP1       | 1.302823   | CHAF18      | 1.0485785  | CDCA25A     | 0.918888   | HSPB1       | 0.8247935  | TNFRSF19    | 0.7582825  | NPY2R       | 0.7012725  |
| SULF2       | 1.3026105  | GSTT2       | 1.045235   | PCSK1       | 0.917031   | FLT1        | 0.824592   | ABCB6       | 0.758199   | ERI1        | 0.7004865  |
| CD7         | 1.2951595  | DPY19L1     | 1.0440825  | DDX21       | 0.9158435  | EMP3        | 0.8238225  | RAB33A      | 0.758004   |             |            |
| SQLE        | 1.295074   | CAPN6       | 1.0422875  | ARHGAP36    | 0.913221   | MCM10       | 0.823391   | ATP6V1E2    | 0.7579695  |             |            |
| HIST1H2BM   | 1.293814   | GALNT6      | 1.0419675  | CRIP1       | 0.912751   | GNAZ        | 0.822219   | MKI67       | 0.7579305  |             |            |
| FAM107B     | 1.290697   | TH          | 1.040307   | BORCS7-ASM  | 0.90979    | COXC5       | 0.820824   | DSCC1       | 0.757059   |             |            |
| LGLA51      | 1.2886055  | DCLRE1A     | 1.034652   | UCP2        | 0.908605   | ALDH1B1     | 0.819841   | G6PC3       | 0.756923   |             |            |
| SERTAD4     | 1.287473   | HIST2H3A    | 1.034609   | DNPEP       | 0.907702   | FAM72B      | 0.8189115  | DDP7        | 0.7560065  |             |            |
| GAL         | 1.28564    | HPCAL1      | 1.031487   | SLC25A43    | 0.907002   | PWP2        | 0.818265   | CDK2AP1     | 0.7553725  |             |            |
| P2RY6       | 1.2848965  | PTP4A2      | 1.029474   | HIST2H2AB   | 0.9066315  | MAPKBIP1    | 0.817379   | RABEPK      | 0.75363    |             |            |
| RPL22L1     | 1.2824695  | PRSS5       | 1.0262955  | MYO19       | 0.906319   | DARS2       | 0.8169945  | ATP1B1      | 0.7533895  |             |            |
| KCNJ8       | 1.2717995  | AURKB       | 1.023682   | LYN         | 0.903675   | CEP55       | 0.8161995  | KIF26A      | 0.7531245  |             |            |
| HS3ST2      | 1.2673875  | UBE2C       | 1.022596   | MELK        | 0.902073   | HIST1H2BL   | 0.815815   | LDB2        | 0.752315   |             |            |
| CDCA3       | 1.26694    | FAM27E3     | 1.0208725  | TPBGL       | 0.9018495  | MTRFR2      | 0.815646   | SLC25A19    | 0.752212   |             |            |
| RRM2        | 1.2647935  | MCHR1       | 1.0187285  | CDKN1A      | 0.8985085  | CLGN        | 0.814457   | USP1        | 0.7519085  |             |            |
| CDCA2EP3    | 1.2616845  | IFT57       | 1.016883   | TOB1        | 0.898062   | LMNB1       | 0.813918   | KLHL23      | 0.7502055  |             |            |
| LMNA        | 1.251905   | KPNA3       | 1.016815   | CDK1        | 0.897526   | PRSS2       | 0.8138965  | DTL         | 0.750125   |             |            |
| S100A10     | 1.243042   | PSRC1       | 1.0144755  | FAM83D      | 0.8953035  | PLXNA2      | 0.813307   | TIMP3       | 0.7497825  |             |            |
| CYSLTR2     | 1.2321625  | SUZ12       | 1.0142565  | HTR3B       | 0.8948555  | CRH         | 0.813196   | TUBB8       | 0.749779   |             |            |
| HELLS       | 1.2296565  | CSR2        | 1.013496   | SCOC        | 0.893171   | HIST1H3A    | 0.812526   | CHML        | 0.7494815  |             |            |
| KIAA0125    | 1.227768   | HNRNP3H     | 1.01341    | GNB4        | 0.892913   | EIF4EBP2    | 0.81247    | FAMS7A      | 0.7492065  |             |            |
| BMP2K       | 1.2217075  | DIAPH3      | 1.010338   | JUN         | 0.890321   | HNRNPDL     | 0.81157    | CD58        | 0.7484855  |             |            |
| TGFB1       | 1.2160885  | GMNN        | 1.0079265  | RM1I        | 0.8901375  | GRAMD1A     | 0.810821   | PAQR8       | 0.7484015  |             |            |
| TYMS        | 1.2151295  | BAALC       | 1.007485   | SNRNP27     | 0.889695   | TTYH3       | 0.810707   | CNBN1       | 0.7472795  |             |            |
| CDCA5       | 1.2086675  | MPHOSPH6    | 1.0042295  | IER2        | 0.889119   | SLC18A2     | 0.809766   | RET         | 0.747065   |             |            |
| PSM3C1P     | 1.2026625  | NPTN        | 1.0018175  | FAM72C      | 0.8886445  | ANGPTL2     | 0.8093625  | DEK         | 0.7468275  |             |            |
| FRMD3       | 1.2021815  | HIST3H2BB   | 1.001207   | PPF1B2      | 0.888034   | DPF1        | 0.8089575  | RND3        | 0.7439775  |             |            |
| DCK         | 1.2005485  | KNTC1       | 1.000174   | HIST1H2BF   | 0.887842   | PIH1D1      | 0.8068015  | MCM6        | 0.743682   |             |            |
| NSG1        | 1.181681   | ENCL1       | 1.000114   | MCUR1       | 0.88769    | RELN        | 0.8053735  | ADAMTS7     | 0.7430355  |             |            |
| ELAVL3      | 1.179775   | NRM         | 0.997943   | RM12        | 0.8859815  | MCM2        | 0.805226   | PNP         | 0.742527   |             |            |
| SLC25A32    | 1.176584   | SH2B3       | 0.997209   | LSM1        | 0.8837495  | ENOPH1      | 0.805192   | HIST1H1B    | 0.74043    |             |            |
| CORO1C      | 1.1704935  | TLF3        | 0.995669   | SRSF1       | 0.8828955  | EXOSC5      | 0.8037515  | NCOA3       | 0.7402835  |             |            |
| UHRF1       | 1.159782   | PCNA        | 0.99512    | CDON        | 0.8819025  | TUBB4B      | 0.803145   | PIOD2       | 0.7400575  |             |            |
| NXT2        | 1.1567385  | MBNL3       | 0.9938415  | SEH1L       | 0.8801325  | TIPIN       | 0.801921   | CXCR4       | 0.739905   |             |            |
| GFR2        | 1.15497    | NDUFAF6     | 0.990284   | HIST1H1C    | 0.8796435  | TCF12       | 0.8014205  | GRAMD4      | 0.739758   |             |            |
| RG516       | 1.1508545  | EXO1        | 0.989692   | DOK4        | 0.87874    | POPCD2      | 0.8002575  | CHEK1       | 0.738866   |             |            |
| LRRC34      | 1.1499455  | DUSP4       | 0.9866795  | PLEKHA6     | 0.8783175  | RNF8        | 0.800197   | CDCA5       | 0.737542   |             |            |
| MRAP2       | 1.148787   | KAAO101     | 0.9857315  | PHF10       | 0.877968   | ISLR        | 0.7997445  | MCM8        | 0.7374675  |             |            |
| FAM222A     | 1.1487165  | PREDL1      | 0.9852385  | HIST1H4L    | 0.8771565  | CTNNA1      | 0.799674   | CCDC74B     | 0.7367225  |             |            |
| KLHL23      | 1.147348   | CDT1        | 0.983783   | LAYN        | 0.876545   | LRP8        | 0.7988175  | 3-Mar       | 0.736406   |             |            |
| SPAG5       | 1.14667    | FTSJ3       | 0.983726   | SHMT2       | 0.875315   | SFXN4       | 0.795168   | JUNB        | 0.7356215  |             |            |
| FAM35A      | 1.144537   | FTSJ1       | 0.982525   | PRDM1       | 0.872831   | MAML2       | 0.793564   | UAP1L1      | 0.7356215  |             |            |
| ICAM2       |            |             |            |             |            |             |            |             |            |             |            |

**Supplementary Table 5. Genes downregulated by GSK-J4 related to Fig. 6b.**

| Description | log2 (FC) | Description | log2 (FC) | Description | log2 (FC) | Description | log2 (FC) |
|-------------|-----------|-------------|-----------|-------------|-----------|-------------|-----------|
| GABRA4      | 2.002878  | CETN3       | 0.980721  | IFIT5       | 0.8291315 | HOMER1      | 0.7665685 |
| GPR22       | 1.960247  | EEF2KMT     | 0.9802005 | VSTM4       | 0.82664   | ANXA6       | 0.7662745 |
| CDCA3       | 1.7204595 | PPEF1       | 0.9784665 | HSD17B7     | 0.8264445 | CAPN6       | 0.7662495 |
| CDK15       | 1.6739825 | TUBB8       | 0.9718005 | DLEU2       | 0.825846  | DEPDC1B     | 0.765342  |
| FAM72B      | 1.6477365 | KIAA1024L   | 0.9716115 | ZRANB2      | 0.824392  | LCMT2       | 0.765181  |
| FAM72A      | 1.5706995 | HIST1H3A    | 0.967069  | UNG         | 0.82302   | KIF4A       | 0.764856  |
| OAS1        | 1.5681005 | ISOC1       | 0.96462   | TIAM1       | 0.822294  | HIST1H4D    | 0.7637735 |
| HS3ST2      | 1.54878   | NABP1       | 0.962395  | DCTPP1      | 0.8213435 | HIST1H2BB   | 0.763099  |
| ARHGEF39    | 1.5020165 | LRRC34      | 0.9586415 | PRMT6       | 0.821043  | CBR4        | 0.763014  |
| FAM72D      | 1.4797305 | KIF14       | 0.9562595 | UCP2        | 0.820882  | BORCS7-ASMT | 0.7629915 |
| BUB1        | 1.4796205 | GNB4        | 0.956252  | WDR46       | 0.820758  | ALG1        | 0.7595085 |
| CEP55       | 1.473713  | SELENBP1    | 0.953799  | KIFC1       | 0.820184  | MKI67       | 0.758077  |
| FAM72C      | 1.446828  | MCM10       | 0.9522335 | MARVELD1    | 0.8201745 | ZNF287      | 0.7579165 |
| ABCA12      | 1.3988565 | GLA         | 0.9469565 | CAB39L      | 0.8201555 | HYLS1       | 0.757493  |
| CENPA       | 1.3631    | FBXO43      | 0.946167  | CD47        | 0.819867  | BUB1B       | 0.755509  |
| PIGW        | 1.3570155 | RMI1        | 0.9404065 | MAG1        | 0.8197065 | CENPW       | 0.755419  |
| CHAC2       | 1.355461  | TNFAIP8     | 0.9389385 | C3orf14     | 0.8196045 | SCARA3      | 0.754553  |
| DHCR24      | 1.3536805 | S1PR1       | 0.9381585 | CCDC167     | 0.8191785 | RBPMS2      | 0.7528355 |
| CDKN3       | 1.3530515 | MPHOSPH6    | 0.9378775 | METTL7A     | 0.81756   | GTSE1       | 0.752401  |
| POPS        | 1.3423625 | CROT        | 0.9375545 | HIST1H2BG   | 0.8138175 | CTPS1       | 0.752385  |
| ADAMTS1     | 1.3422115 | NEFH        | 0.934242  | C1orf131    | 0.8110815 | FAM111B     | 0.751711  |
| KIF20A      | 1.339638  | ESCO2       | 0.929226  | LRP8        | 0.8110585 | PLK1        | 0.751675  |
| SLC27A6     | 1.29907   | LUM         | 0.9232585 | CCNE1       | 0.8109765 | CCNF        | 0.751412  |
| LRRTM1      | 1.294278  | COL6A6      | 0.9227425 | CDC4A       | 0.810786  | PNO1        | 0.7513895 |
| ADAMTS4     | 1.290066  | LHX9        | 0.9222    | E2F8        | 0.8105455 | FAM173B     | 0.750627  |
| FABP5       | 1.2832225 | HIST1H4L    | 0.922108  | LRR1        | 0.809842  | CCDC121     | 0.7488295 |
| TTF2        | 1.2813805 | CENPI       | 0.9201795 | HIST2H3A    | 0.809542  | SLC3E3      | 0.746751  |
| HMMR        | 1.269343  | TIPIN       | 0.917628  | ABCD2       | 0.8094315 | KIAA0125    | 0.7460965 |
| HIST1H2BI   | 1.250498  | BCKDHB      | 0.915872  | EHD4        | 0.8092155 | WDR35       | 0.7456365 |
| SCGN        | 1.250291  | AOX1        | 0.9152305 | PALMD       | 0.8088365 | FDP5        | 0.744777  |
| PSRC1       | 1.232345  | TUBD1       | 0.9009015 | SOSTDC1     | 0.8083645 | ANLN        | 0.7432525 |
| SSPN        | 1.2238975 | RPH3A       | 0.900191  | LMNB1       | 0.8081145 | CCNE2       | 0.7426865 |
| FAM83D      | 1.2079625 | POPCD2      | 0.8983815 | MTERF3      | 0.8054075 | ELAC2       | 0.740663  |
| CCNB1       | 1.205968  | PON2        | 0.8967725 | POLE2       | 0.8049455 | NUDT19      | 0.739674  |
| PCDH18      | 1.202608  | AURKA       | 0.896661  | TTC38       | 0.8024935 | CDC20       | 0.737603  |
| SHOX2       | 1.18655   | MTUS2       | 0.896244  | SEMA3A      | 0.8014545 | MCC2        | 0.73455   |
| HIST1H2AB   | 1.182082  | RBM45       | 0.894017  | KDM8        | 0.8010355 | CBLN1       | 0.734272  |
| SGOL2       | 1.1751515 | GATS        | 0.8922285 | C10orf128   | 0.8008925 | LPCAT3      | 0.7335965 |
| WDR77       | 1.173651  | CDK1        | 0.890077  | SLC25A53    | 0.7989435 | CTSA        | 0.733365  |
| TRIM59      | 1.1730225 | TUBB4B      | 0.889865  | ENTPD3      | 0.798145  | NGG12       | 0.7326305 |
| DLGAP5      | 1.1710225 | PIK3R3      | 0.887125  | DCAF6       | 0.798085  | DPYSL5      | 0.731481  |
| ADAM12      | 1.1449395 | OIP5        | 0.8831055 | AS3MT       | 0.797713  | NEXN        | 0.7314255 |
| TRMU        | 1.143721  | CD3EAP      | 0.8818075 | HIST2H4A    | 0.7970625 | GRWD1       | 0.731416  |
| HSPA2       | 1.140671  | HIST1H1B    | 0.881675  | EID1        | 0.795116  | NUDCD2      | 0.7312255 |
| DKK1        | 1.139863  | RNF145      | 0.8802055 | LIG4        | 0.7949885 | BCCIP       | 0.7305175 |
| ACE         | 1.1212455 | ELK3        | 0.879889  | RBM14       | 0.7941745 | MTERF2      | 0.7303635 |
| POLR3G      | 1.1188425 | ECT2        | 0.874101  | STOM        | 0.7938595 | FJX1        | 0.730258  |
| MRAP2       | 1.1010955 | NOL6        | 0.870661  | ITPR1PL1    | 0.793361  | CCDC71      | 0.7296725 |
| ZC3H4       | 1.094208  | HSPA4L      | 0.869473  | ITGA9       | 0.793001  | KNOP1       | 0.7270215 |
| HMGNS5      | 1.0824625 | CRYZ        | 0.868288  | POLR3H      | 0.792142  | NUSAP1      | 0.726642  |
| POP1        | 1.077091  | SRSF2       | 0.867641  | C1QL1       | 0.791371  | CLC         | 0.7237075 |
| FRZB        | 1.0750525 | GTF2H2      | 0.866721  | ALDH4A1     | 0.7908575 | HN1L        | 0.7234235 |
| FABP5       | 1.0652625 | NRP2        | 0.8664605 | TMPO        | 0.7905385 | TIMM8B      | 0.72046   |
| RNF26       | 1.059643  | ADI1        | 0.866282  | ZDHC16      | 0.7896755 | CHCHD7      | 0.719318  |
| TMEM19      | 1.0553845 | NT5E        | 0.8653925 | NDUFA10     | 0.7894015 | ZNF480      | 0.7186005 |
| TACC3       | 1.051755  | TRIP13      | 0.8617965 | PRDX1       | 0.7890845 | MRPL50      | 0.7181995 |
| WDR4        | 1.049956  | EFHC2       | 0.8588445 | UBE2S       | 0.7886335 | RHOB        | 0.71716   |
| CPT2        | 1.0412195 | HELLS       | 0.858723  | DCN         | 0.787255  | GLRX2       | 0.7168405 |
| HIST1H2BM   | 1.02962   | RGS2        | 0.858473  | GCH1        | 0.7869755 | HIST1H2BJ   | 0.7135355 |
| LCP1        | 1.0275845 | AURKB       | 0.858079  | INCENP      | 0.785728  | CHTF8       | 0.7134925 |
| C8orf48     | 1.024732  | HIST2H3A    | 0.8557945 | SEMA3E      | 0.7843485 | UTP20       | 0.7129835 |
| PTTG1       | 1.024696  | POLR2L      | 0.85529   | GMNN        | 0.782422  | SLC2A6      | 0.712346  |
| SLC46A3     | 1.0245685 | RTL1        | 0.8526685 | UBE2T       | 0.7808795 | HRH3        | 0.710794  |
| CENPE       | 1.0209985 | KIF23       | 0.8524295 | CD248       | 0.780732  | GPSM2       | 0.710195  |
| MBOAT4      | 1.0162175 | SST         | 0.850459  | RGL1        | 0.7800075 | RBM14-RBM4  | 0.7094855 |
| HTATIP2     | 1.012118  | BEX1        | 0.8476705 | SPDL1       | 0.779799  | PUS7        | 0.709147  |
| ACAT2       | 1.011124  | RNFT1       | 0.8471105 | DBI         | 0.7794305 | CCNB2       | 0.7089505 |
| IGFBP7      | 1.0103975 | MAP2K6      | 0.8454915 | P2RY6       | 0.7791215 | GTF3C6      | 0.708847  |
| PPP1R10     | 1.0065005 | CLMP        | 0.841766  | NLRP14      | 0.7779535 | UBE2C       | 0.708718  |
| SNRPG       | 1.0051075 | RARG        | 0.8412255 | FKBP7       | 0.777402  | FAM217B     | 0.707986  |
| SDHAF3      | 1.0047995 | RAB29       | 0.838671  | ZC2HC1C     | 0.7767285 | CDK5        | 0.705987  |
| FABP6       | 1.004217  | METTL18     | 0.836372  | NDC80       | 0.7749395 | NDUFAF3     | 0.705917  |
| HIST1H3G    | 1.0029625 | ASPM        | 0.83573   | DOLK        | 0.774007  | FAM86C1     | 0.705856  |
| DARS2       | 0.9981075 | PEBP1       | 0.835273  | ACAD5B      | 0.773414  | CAMKV       | 0.7043205 |
| TIGAR       | 0.9933485 | CYB561      | 0.835042  | C12orf66    | 0.7729535 | SPA17       | 0.703667  |
| GABRB1      | 0.9921695 | MGST2       | 0.834794  | GSTA4       | 0.7719455 | PLBD1       | 0.7035385 |
| LPCAT1      | 0.9898065 | ANAPC15     | 0.8332625 | NXP2        | 0.7708635 | UMPS        | 0.7030695 |
| HIST1H1D    | 0.9867975 | RELL1       | 0.8310665 | RORA        | 0.7702965 | CTSF        | 0.7027555 |
| C9orf64     | 0.984354  | C6orf120    | 0.830514  | COA5        | 0.7682175 | NDE1        | 0.70091   |
| CETN3       | 0.980721  | UHRF1       | 0.8301445 | MRPL40      | 0.7676895 | AK1         | 0.7006635 |
|             |           |             |           |             |           | BCHE        | 0.700625  |

**Supplementary Table 6. Genes downregulated by palbociclib related to Fig. 6c and d.**

| Common 89 genes |              |          |          |
|-----------------|--------------|----------|----------|
| HS3ST3A1        | PALM3        | SEPT4    | TNFAIP8  |
| KLHL14          | CDT1         | PIM1     | PAQR5    |
| PCSK1           | RNASEH2B     | CDCA7L   | DLX5     |
| DDB2            | PMAIP1       | OAS3     | ABCB4    |
| ZNF385B         | BHLHE40      | NEMP2    | MXD3     |
| ORC1            | NHS          | DDX60    | KIF15    |
| AURKB           | GPC3         | XKR5     | METTL7A  |
| MIR503HG        | CCBE1        | ARHGEF39 | HJURP    |
| BARD1           | RP11-214O1.2 | KIF2C    | HHIP     |
| IMPA2           | BHLHE41      | HIRIP3   | CTNNAL1  |
| FAM72D          | SOX2         | CDCA7    | KIF20A   |
| KANK4           | SPC24        | FOXN4    | CEP152   |
| E2F7            | RDM1         | CDC20    | TRIM59   |
| PSRC1           | LBR          | C8orf88  | FAM72C   |
| GPM6A           | E2F8         | EXOSC8   | ANP32B   |
| MEGF6           | NID1         | PRR11    | C21orf58 |
| CRNDE           | CTB-193M12.5 | HMGB2    | PDGFC    |
| C2orf48         | KDELC2       | H1FO     |          |
| NDE1            | TGM2         | ITGA4    |          |
| CD302           | TEX19        | PRIM1    |          |
| ANKRD18B        | BORA         | CDCA3    |          |
| KIAA1644        | MBOAT1       | RARRES2  |          |
| SERTAD4         | SKP2         | NQO1     |          |
| ERFE            | FAM72B       | TOP2A    |          |



**Supplementary Table 7. A 149 gene signature related to Fig. 7.**

|          |           |         |
|----------|-----------|---------|
| CCNB1    | DDX28     | WDR77   |
| CCNE1    | NOP56     | CTPS1   |
| FUS      | RRM2      | SNRNP25 |
| CLCN4    | FEN1      | SPA17   |
| UNG      | NCAPD2    | POP1    |
| ARMC6    | MRPL40    | RPA3    |
| KIF4A    | FAM83D    | DLGAP5  |
| MCM10    | CHAF1B    | MKI67   |
| KLRG1    | MCM6      | ZC3H4   |
| HN1      | POP5      | CDKN2C  |
| NDC80    | PIGW      | TUBB4B  |
| CCNA2    | ZNF326    | POLA2   |
| MAG11    | TRIM59    | SPC24   |
| PSRC1    | UHRF1     | E2F8    |
| UCP2     | COA3      | HMGB3   |
| KIF23    | FGD6      | NDUFAF3 |
| PTCD2    | CENPF     | SFXN2   |
| BRI3BP   | SLC25A53  | PLK1    |
| LMNB1    | SLC35B4   | MRPL24  |
| CCNB2    | CDCA8     | PIK3R3  |
| MCM2     | UTP20     | MAP2K6  |
| MCM4     | TPX2      | ALDH1B1 |
| RPUSD2   | ANP32E    | LRRC34  |
| CKAP2L   | GIN51     | KDM8    |
| DTD2     | KPNA2     | PRMT6   |
| CDCA2    | BIRC5     | FAM86C1 |
| JMJD8    | FABP5     | MANEAL  |
| GJC1     | SUV39H2   | CBLN1   |
| CCNF     | AURKA     | RMI1    |
| ALG1     | AURKB     | ASPM    |
| GEMIN5   | TIPIN     | PNRC2   |
| EEF2KMT  | GRWD1     | TMSB15A |
| LBR      | RANBP1    | ACAD9   |
| DARS2    | KCTD17    | CDCA3   |
| ESPL1    | GEMIN4    | ACAT2   |
| FKBP7    | C1orf131  | HNRNPM  |
| GTF2E1   | LCMT2     | SRSF1   |
| TTF2     | GTSE1     | NOL6    |
| SFPQ     | KNOP1     | SPC25   |
| KIF11    | PTTG1     | BUB1B   |
| KNSTRN   | PFAS      | POLR3H  |
| KIFC1    | CENPE     | HMMR    |
| TMPO     | MRM1      | FAM217B |
| MRPS7    | HN1L      | GMNN    |
| ARHGEF39 | HNRNPA2B1 | KIF20A  |
| RUVBL1   | TACC3     | CCDC121 |
| WDR4     | NAE1      | FDPS    |
| CENPA    | ICMT      | AMD1    |
| H2AFX    | SLC2A6    | NUSAP1  |
| UROS     | CEP55     |         |

**Supplementary Table 8. The gene list differentially expressed in high-risk and low-risk neuroblastomas related to Fig. 7.**

| Gene symbol | Class     |
|-------------|-----------|
| RPA3        | High-risk |
| KIF20A      | High-risk |
| SFXN2       | High-risk |
| MCM6        | High-risk |
| RPUSD2      | High-risk |
| MKI67       | High-risk |
| NUSAP1      | High-risk |
| PTTG1       | High-risk |
| DARS2       | High-risk |
| CDC42       | High-risk |
| MCM2        | High-risk |
| GMNN        | High-risk |
| LMNB1       | High-risk |
| UNG         | High-risk |
| BUB1B       | High-risk |
| POLA2       | High-risk |
| HNRNP35     | High-risk |
| SUV39H2     | High-risk |
| WDR77       | High-risk |
| FAM83D      | High-risk |
| CCNE1       | High-risk |
| KIF23       | High-risk |
| MCM4        | High-risk |
| MCM10       | High-risk |
| GIN51       | High-risk |
| TPX2        | High-risk |
| SNRNP25     | High-risk |
| TMPO        | High-risk |
| CENPF       | High-risk |
| NCAPD2      | High-risk |
| CHAF1B      | High-risk |
| TTF2        | High-risk |
| DDX28       | High-risk |
| AURKA       | High-risk |
| DLGAP5      | High-risk |
| ANP32E      | High-risk |
| RRM2        | High-risk |
| CENPA       | High-risk |
| ARMC6       | High-risk |
| CCNA2       | High-risk |
| TUBB4B      | High-risk |
| FEN1        | High-risk |
| PLK1        | High-risk |
| HN1         | High-risk |
| TIPIN       | High-risk |
| RANBP1      | High-risk |
| CCNB1       | High-risk |
| SRSF1       | High-risk |
| MRPS7       | High-risk |
| CENPE       | High-risk |
| H2AFX       | High-risk |
| KIFC1       | High-risk |
| KPNA2       | High-risk |
| KIF11       | High-risk |
| SPC25       | High-risk |
| TRIM59      | High-risk |
| TACC3       | High-risk |
| POP1        | High-risk |
| GRWD1       | High-risk |
| CDC48       | High-risk |
| SPC24       | High-risk |
| TMSB15A     | High-risk |
| NDC80       | High-risk |
| E2F8        | High-risk |
| GTSE1       | High-risk |
| AURKB       | High-risk |
| CBLN1       | High-risk |
| HMGB3       | High-risk |
| UHRF1       | High-risk |
| BRI3BP      | High-risk |
| ESPL1       | High-risk |
| UTP20       | High-risk |
| GJC1        | High-risk |
| KNSTRN      | High-risk |
| CKAP2L      | High-risk |
| ASPM        | High-risk |
| CEP55       | High-risk |
| RUVBL1      | High-risk |
| BIRC5       | High-risk |
| HMMR        | High-risk |
| PSRC1       | High-risk |
| LBR         | High-risk |
| KIF4A       | High-risk |
| CCNB2       | High-risk |
| DTD2        | High-risk |
| ARHGEF39    | Low risk  |
| ICMT        | Low risk  |
| PNRC2       | Low risk  |
| POP5        | Low risk  |
| SFPQ        | Low risk  |
| SLC35B4     | Low risk  |
| POLR3H      | Low risk  |
| MANEAL      | Low risk  |
| CDKN2C      | Low risk  |
| CCDC121     | Low risk  |
| ALG1        | Low risk  |
| KDM8        | Low risk  |
| SLC2A6      | Low risk  |
| PIK3R3      | Low risk  |
| JMJD8       | Low risk  |
| KLRG1       | Low risk  |
| UCP2        | Low risk  |
| FAM217B     | Low risk  |
| FGD6        | Low risk  |
| MAG11       | Low risk  |
