# Supplementary material for: KDM6B promotes activation of the oncogenic CDK4/6-pRB-E2F pathway by maintaining enhancer activity in MYCN-amplified neuroblastoma
Source: PubMed Central journal article supplement (PMC8664842; doi:10.1038/s41467-021-27502-2), 2021-12-10
Supplement: 41467_2021_27502_MOESM3_ESM.pdf [file 41467_2021_27502_MOESM3_ESM.pdf]

## **Description of Additional Supplementary Files**

File Name: Supplementary Data 1

Description: The differential H3K27me3 peaks induced by KDM6B knockdown and GSK-J4 treatment.

File Name: Supplementary Data 2

Description: The differential H3K4me1 peaks induced by KDM6B knockdown and GSK-J4 treatment.
