# Supplementary material for: KDM6B promotes activation of the oncogenic CDK4/6-pRB-E2F pathway by maintaining enhancer activity in MYCN-amplified neuroblastoma
Source: PubMed Central journal article supplement (PMC8664842; doi:10.1038/s41467-021-27502-2), 2021-12-10
Supplement: 41467_2021_27502_MOESM6_ESM.pdf [file 41467_2021_27502_MOESM6_ESM.pdf]

## Reporting Summary

Nature Portfolio wishes to improve the reproducibility of the work that we publish. This form provides structure for consistency and transparency in reporting. For further information on Nature Portfolio policies, see our [Editorial Policies](#) and the [Editorial Policy Checklist](#).

### Statistics

For all statistical analyses, confirm that the following items are present in the figure legend, table legend, main text, or Methods section.

- |     |           |
|-----|-----------|
| n/a | Confirmed |
|-----|-----------|
- The exact sample size ( $n$ ) for each experimental group/condition, given as a discrete number and unit of measurement
  - A statement on whether measurements were taken from distinct samples or whether the same sample was measured repeatedly
  - The statistical test(s) used AND whether they are one- or two-sided  
*Only common tests should be described solely by name; describe more complex techniques in the Methods section.*
  - A description of all covariates tested
  - A description of any assumptions or corrections, such as tests of normality and adjustment for multiple comparisons
  - A full description of the statistical parameters including central tendency (e.g. means) or other basic estimates (e.g. regression coefficient) AND variation (e.g. standard deviation) or associated estimates of uncertainty (e.g. confidence intervals)
  - For null hypothesis testing, the test statistic (e.g.  $F$ ,  $t$ ,  $r$ ) with confidence intervals, effect sizes, degrees of freedom and  $P$  value noted  
*Give  $P$  values as exact values whenever suitable.*
  - For Bayesian analysis, information on the choice of priors and Markov chain Monte Carlo settings
  - For hierarchical and complex designs, identification of the appropriate level for tests and full reporting of outcomes
  - Estimates of effect sizes (e.g. Cohen's  $d$ , Pearson's  $r$ ), indicating how they were calculated

*Our web collection on [statistics for biologists](#) contains articles on many of the points above.*

### Software and code

Policy information about [availability of computer code](#)

- |                 |                                                                                                                                                                                                                                                                                                                                                                                                                                                                                                                                                                                                                                                                                                                                                                                                                                                                                                                                                                                                                                                                                                                                                                                                                                       |
|-----------------|---------------------------------------------------------------------------------------------------------------------------------------------------------------------------------------------------------------------------------------------------------------------------------------------------------------------------------------------------------------------------------------------------------------------------------------------------------------------------------------------------------------------------------------------------------------------------------------------------------------------------------------------------------------------------------------------------------------------------------------------------------------------------------------------------------------------------------------------------------------------------------------------------------------------------------------------------------------------------------------------------------------------------------------------------------------------------------------------------------------------------------------------------------------------------------------------------------------------------------------|
| Data collection | RNA-seq data were collected by Paired-end sequencing was performed using the Illumina HiSeq 2500 with 100bp read length. Affymetrix microarray data were generated by Affymetrix Clariom S human array. ATAC-seq were collected by Paired-end 2X100bp sequencing with Illumina HiSeq 4000. Motifs were downloaded from TRANSFEC (v2018.3). Cut&Tag data were collected by the Paired-end sequencing with Illumina HiSeq2500 with 50bp read length.                                                                                                                                                                                                                                                                                                                                                                                                                                                                                                                                                                                                                                                                                                                                                                                    |
| Data analysis   | Commercial and publicly available softwares were used to analyze data.<br>For RNA-seq data analysis, STAR 2.5.3a, HTSeq 0.6.1p, VOOM, LIMMA 3.26.9 were used.<br>For Affymetrix Clariom S human array data, GenePattern program version 3.9.11 was used.<br>For ATAC-seq data analysis, cutadapt version 1.9, BWA version 0.7.12-r1039, Picard 2.6.0-SNAPSHOT, samtools version 1.2, MACS2 version 2.1.1, IGV version 2.4.13, Bedtools version 2.24.0(mergeBed), R version 3.23, Voom function from edgeR 3.12.1, limma 3.26.9, MEME suite v4.11.3, Fisher exact test using stats module from Scipy 1.0.0, were used.<br>For Cut&Tag data analysis, SPP version 1.1, Picard 1.6.5, BWA version 0.7.12, MACS version 2.2.7.1, SICER version 1.1, bedtools version 2.25.0, samtools version 1.3.1, BigWigToBedGraph, bigWigMerge, bedGraphToBigWig, IGV version 2.4.13, DeepTools version 2.3, MergeBed, annotatePeaks.pl, edgeR 3.16.5, Homer software version 4.8.3 were used.<br>GSEA 4.1.0 program was used for analyzing gene pathway enrichment.<br>Other programs including Microsoft Excel version 16.54, Adobe Phostshop version 2021, Adobe Illustrator version 2021, Prism GraphPad 9 were used to present and analyze data. |

For manuscripts utilizing custom algorithms or software that are central to the research but not yet described in published literature, software must be made available to editors and reviewers. We strongly encourage code deposition in a community repository (e.g. GitHub). See the Nature Portfolio [guidelines for submitting code & software](#) for further information.

## Data

Policy information about [availability of data](#)

All manuscripts must include a [data availability statement](#). This statement should provide the following information, where applicable:

- Accession codes, unique identifiers, or web links for publicly available datasets
- A description of any restrictions on data availability
- For clinical datasets or third party data, please ensure that the statement adheres to our [policy](#)

The RNA-seq, ATAC-seq, Cut&Tag raw data have been deposited to the Gene Expression Omnibus-GEO (NCBI) as superseries, under accession number GSE149539 ([https://www.ncbi.nlm.nih.gov/gds/?term=GSE149539\[Accession\]](https://www.ncbi.nlm.nih.gov/gds/?term=GSE149539[Accession])). The Affymetrix microarray data have been deposited to GEO under accession number GSE150045 (<https://www.ncbi.nlm.nih.gov/geo/query/acc.cgi?acc=GSE150045>). Databases/datasets used in the study were the following: Library of Integrated Network-based Cellular Signatures (LINCS) (<https://maayanlab.cloud/Enrichr/>), The Cancer Therapeutics Response Portal (CTRP) (<https://portals.broadinstitute.org/ctrp.v2.1/>), R2: Genomics Analysis and Visualization Platform (<https://hgserver1.amc.nl/cgi-bin/r2/main.cgi>), Cancer Cell Line Encyclopedia-CCLE (<https://sites.broadinstitute.org/ccle/>), St Jude Pecan Portal (<https://pecan.stjude.cloud/>; [https://pecan.stjude.cloud/proteinpaint/study/mycn\\_nbl\\_2018](https://pecan.stjude.cloud/proteinpaint/study/mycn_nbl_2018)), CellMinerCDB (<https://discover.nci.nih.gov/rsconnect/cellminerfdb/>). TRANSFAC (<https://genexplain.com/transfac/>). The authors declare that other data supporting the findings of this study are provided in the Supplementary information/Data/Source Data files. Uncropped western blot images are present in Source Data file. Source data files are provided with this paper.

## Field-specific reporting

Please select the one below that is the best fit for your research. If you are not sure, read the appropriate sections before making your selection.

- Life sciences       Behavioural & social sciences       Ecological, evolutionary & environmental sciences

For a reference copy of the document with all sections, see [nature.com/documents/nr-reporting-summary-flat.pdf](https://www.nature.com/documents/nr-reporting-summary-flat.pdf)

## Life sciences study design

All studies must disclose on these points even when the disclosure is negative.

|                 |                                                                                                                                                                                                                                                                                                                                                                                                                                                                                                                                                                                             |
|-----------------|---------------------------------------------------------------------------------------------------------------------------------------------------------------------------------------------------------------------------------------------------------------------------------------------------------------------------------------------------------------------------------------------------------------------------------------------------------------------------------------------------------------------------------------------------------------------------------------------|
| Sample size     | Experiments were designed to have enough sample sizes to obtain reliable results. Neural crest tissue sample size n=5, Versteeg tumor sample size n=88, Delattre tumor sample size n=64, Hiyama tumor sample size n=51, Lastowska tumor sample size n=30, St Jude dataset tumor sample size =160, TARGET dataset tumor sample size n=161, SEQC dataset tumor sample size n=498. For in vitro experiments, at least three independent replicates and a minimum of two biological replicates were used for each experiment to ensure the reproducibility and to perform statistical analysis. |
| Data exclusions | No data exclusion                                                                                                                                                                                                                                                                                                                                                                                                                                                                                                                                                                           |
| Replication     | Data was obtained from three technical replicates and in at least two biological replicates. Independent biological replicates are shown in all figures.                                                                                                                                                                                                                                                                                                                                                                                                                                    |
| Randomization   | Randomization was not relevant. All cell lines or biological samples were analyzed or treated in the same manner.                                                                                                                                                                                                                                                                                                                                                                                                                                                                           |
| Blinding        | Experiments were not blinded in order to allow the investigators to have correct identification of samples and to ensure the correct data collection. In other hand, blinding strategy was applied to computational biologists who performed bioinformatic analyses.                                                                                                                                                                                                                                                                                                                        |

## Reporting for specific materials, systems and methods

We require information from authors about some types of materials, experimental systems and methods used in many studies. Here, indicate whether each material, system or method listed is relevant to your study. If you are not sure if a list item applies to your research, read the appropriate section before selecting a response.

### Materials & experimental systems

| n/a                                 | Involved in the study                                     |
|-------------------------------------|-----------------------------------------------------------|
| <input type="checkbox"/>            | <input checked="" type="checkbox"/> Antibodies            |
| <input type="checkbox"/>            | <input checked="" type="checkbox"/> Eukaryotic cell lines |
| <input checked="" type="checkbox"/> | <input type="checkbox"/> Palaeontology and archaeology    |
| <input checked="" type="checkbox"/> | <input type="checkbox"/> Animals and other organisms      |
| <input checked="" type="checkbox"/> | <input type="checkbox"/> Human research participants      |
| <input checked="" type="checkbox"/> | <input type="checkbox"/> Clinical data                    |
| <input checked="" type="checkbox"/> | <input type="checkbox"/> Dual use research of concern     |

### Methods

| n/a                                 | Involved in the study                           |
|-------------------------------------|-------------------------------------------------|
| <input type="checkbox"/>            | <input checked="" type="checkbox"/> ChIP-seq    |
| <input checked="" type="checkbox"/> | <input type="checkbox"/> Flow cytometry         |
| <input checked="" type="checkbox"/> | <input type="checkbox"/> MRI-based neuroimaging |

## Antibodies used

H3K27me3 Cell Signaling Technology Cat# 9733, RRID:AB\_2616029, 1:1000 for western blot, 1:50 for CUT&Tag  
 H3K4me1 Abcam Cat# ab8895, RRID:AB\_306847, 1:1000 for western blot, 1:50 for CUT&Tag  
 H3K4me3 RevMab Biosciences Cat# 31-1226-00, RRID:AB\_2783580, 1:2000  
 H3K27ac Active Motif Cat# 39133, RRID:AB\_2561016, 1:1000 for western blot  
 Total H3 Cell Signaling Technology Cat#4499, RRID: AB\_10544537, 1:5000 for western blot  
 CDK4 Cell Signaling Technology Cat# 12790, RRID:AB\_2631166, 1:1000 for western blot  
 CDK6 Cell Signaling Technology Cat# 13331, RRID:AB\_2721897, 1:1000 for western blot  
 $\beta$ -ACTIN Sigma-Aldrich Cat# A1978, RRID:AB\_476692, 1:5000 for western blot  
 KDM6B Abcam Cat# 154126, RRID:AB\_2722742, 1:1000 for western blot  
 KDM6B, ABclonal, Inc., Cat#A12763, RRID:AB\_2759609, 1:1000 for western blot  
 RB1 (4H1) Cell Signaling Technology Cat# 9309, RRID:AB\_823629, 1:2000 for western blot  
 N-MYC Cell Signaling Technology Cat# 9405, RRID:AB\_10692664, 1:1000 for western blot  
 N-MYC Santa Cruz Biotechnology Cat# sc-53993, RRID:AB\_831602, 1:200 for western blot  
 C-MYC Cell Signaling Technology Cat# 13987, RRID:AB\_2631168, 1:1000 for western blot  
 C-Myc, Cell Signaling Technology, Cat# 5605, RRID:AB\_1903938, 1:1000 for western blot  
 GAPDH Cell Signaling Technology Cat# 5174, RRID:AB\_10622025, 1:1000 for western blot  
 H3K9me3, Active Motif, Cat# 39161, RRID:AB\_2532132, 1:1000 for western blot  
 H3K36me3, Abcam, Cat# ab9050, RRID:AB\_306966, 1:1000 for western blot  
 Secondary horseradish peroxidase (HRP)-conjugated goat anti-mouse, Thermo Fischer Scientific Cat#31430, RRID:AB\_228307,1:5000 for western blot  
 Secondary horseradish peroxidase (HRP)-conjugated goat anti-rabbit, Thermo Fischer Scientific Cat#31460, RRID:AB\_228341, 1:5000 for western blot

## Validation

All antibodies were purchased from commercial vendors and were validated by manufactures, other studies and/or in this study. We also provided associated datasheets link as below. Please note some antibodies may have been discontinued.

H3K27me3 (Cell Signaling Technology, Cat# 9733) website validation: 556 citations. Western blot analysis successfully stained in various cell lines lysis.

<https://www.cellsignal.com/products/primary-antibodies/tri-methyl-histone-h3-lys27-c36b11-rabbit-mab/9733>

CUT&Tag validation: Kaya-Okur, H. S., Janssens, D. H., Henikoff, J. G., Ahmad, K. & Henikoff, S. Efficient low-cost chromatin profiling with CUT&Tag. Nat Protoc 15, 3264-3283, doi:10.1038/s41596-020-0373-x (2020)

H3K4me1 (Abcam, Cat#ab8895) website validation: 803 citations. Western blot analysis successfully stained in various cell lines lysis.

<https://www.abcam.com/histone-h3-tri-methyl-k36-antibody-chip-grade-ab9050.html>

CUT&Tag validation: Kaya-Okur, H. S., Janssens, D. H., Henikoff, J. G., Ahmad, K. & Henikoff, S. Efficient low-cost chromatin profiling with CUT&Tag. Nat Protoc 15, 3264-3283, doi:10.1038/s41596-020-0373-x (2020)

H3K4me3 (RevMab Biosciences, Cat# 31-1226-00):

<https://www.revmaab.com/index.php/product/anti-trimethyl-histone-h3-lys4-rabbit-mono-clonal-antibody-clone-rm340-h3k4me3-histone-h3-trimethyl-k4/>

H3K27ac (Active Motif, Cat# 39133) website validation: 65 citations. <https://www.activemotif.com/catalog/details/39133>

Total H3 (Cell Signaling Technology, Cat#4499):

<https://www.cellsignal.com/products/primary-antibodies/histone-h3-d1h2-xp-rabbit-mab/4499>

CDK4 (Cell Signaling Technology, Cat# 12790):

<https://www.cellsignal.com/products/primary-antibodies/cdk4-d9g3e-rabbit-mab/12790>

CDK6 (Cell Signaling Technology, Cat# 13331):

<https://www.cellsignal.com/products/primary-antibodies/cdk6-d4s8s-rabbit-mab/13331>

$\beta$ -ACTIN (Sigma-Aldrich, Cat# A1978):

<https://www.sigmaaldrich.com/US/en/product/sigma/a1978>

KDM6B (Abcam Cat# 154126) validated in this study by siRNA knockdown and overexpression.

This antibody is discontinued.

<https://www.abcam.com/kdm6b--jmd3-antibody-c-terminal-ab154126.html>

KDM6B (KDM6B, ABclonal, Inc., Cat#A12763) is validated in this study by siRNA knockdown and overexpression, and in company website.

<https://abclonal.com/catalog-proteins/Kdm6bRabbitAb/A12763>

RB1 (4H1) (Cell Signaling Technology, Cat# 9309):

<https://www.cellsignal.com/products/primary-antibodies/rb-4h1-mouse-mab/9309>

N-MYC (Cell Signaling Technology, Cat# 9405):

<https://www.cellsignal.com/products/primary-antibodies/n-myc-antibody/9405>

N-MYC (Santa Cruz Biotechnology, Cat# sc-53993), website validation: 156 citations.

<https://www.scbt.com/p/n-myc-antibody-b8-4-b>

C-MYC (Cell Signaling Technology, Cat# 13987):

<https://www.cellsignal.com/products/primary-antibodies/c-myc-n-myc-d3n8f-rabbit-mab/13987>

C-Myc (Cell Signaling Technology, Cat# 5605):

<https://www.cellsignal.com/products/primary-antibodies/c-myc-d84c12-rabbit-mab/5605>

GAPDH (Cell Signaling Technology, Cat# 5174):

<https://www.cellsignal.com/products/primary-antibodies/gapdh-d16h11-xp-rabbit-mab/5174>

H3K9me3 (Active Motif, Cat# 39161):

<https://www.activemotif.com/catalog/details/39161>

H3K36me3 (Abcam, Cat# ab9050), website validation: 803 citations.

<https://www.abcam.com/histone-h3-tri-methyl-k36-antibody-chip-grade-ab9050.html>

Secondary horseradish peroxidase (HRP)-conjugated goat anti-mouse (Thermo Fischer Scientific Cat#31430):

<https://www.thermofisher.com/antibody/product/Goat-anti-Mouse-IgG-H-L-Secondary-Antibody-Polyclonal/31430>

Secondary horseradish peroxidase (HRP)-conjugated goat anti-rabbit (Thermo Fischer Scientific Cat#31460):

<https://www.thermofisher.com/antibody/product/Goat-anti-Rabbit-IgG-H-L-Secondary-Antibody-Polyclonal/31460>

## Eukaryotic cell lines

Policy information about [cell lines](#)

Cell line source(s)

Human: BE2C ATCC CRL-2268 RRID:CVCL\_0529  
 Human: SIMA DSMZ ACC 164 RRID:CVCL\_1695  
 Human: U2OS ATCC HTB-96 RRID:CVCL\_0042  
 Human: 293T ATCC CRL-3216 RRID:CVCL\_0063  
 Human: SK-N-DZ ATCC CRL-2149 RRID:CVCL\_1701  
 Human: SK-N-AS ATCC CRL-2137 RRID:CVCL\_1700  
 Human: SK-N-SH ATCC HTB-11 RRID:CVCL\_0531  
 Human: SK-N-FI ATCC CRL-2142 RRID:CVCL\_1702  
 Human: KELLY ECACC 92110411 RRID:CVCL\_2092  
 Human: SKNBE2 COG RRID:CVCL\_0528  
 Human: IMR32 ATCC CL-127 RRID:CVCL\_0346  
 Human: CHLA15 COG RRID:CVCL\_6594  
 Human: CHLA20 COG RRID:CVCL\_6602  
 Human: NB-1691 Peter Houghton RRID:CVCL\_5628  
 Human: NB-1643 Peter Houghton RRID:CVCL\_5627  
 Human: HS68 ATCC CRL-1635 RRID:CVCL\_0839  
 Human: HCT116 ATCC, RRID: CCL\_247  
 Human: HCT116,p53-/- Dr. Bert Vogelstein lab  
 Human: A549 ATCC CCL-185 RRID:CVCL\_0023  
 Human: BE2C-CDK4-OE This paper  
 Human: BE2C-CDK6-OE This paper  
 Human: BE2C-RB1-KO This paper

Authentication

Cell lines were authenticated by short tandem repeat (STR) using Promega PowerPlex 16 HS System once per month.

Mycoplasma contamination

PCR-based method was used for detection of Mycoplasma with LookOut Mycoplasma PCR Detection Kit (Sigma) and JumpStart Taq DNA Polymerase (Sigma) once per month to ensure cells were mycoplasma negative.

Commonly misidentified lines  
(See [ICLAC](#) register)

No commonly misidentified cell lines were used in this study.

## ChIP-seq

Data deposition

Confirm that both raw and final processed data have been deposited in a public database such as [GEO](#).

Confirm that you have deposited or provided access to graph files (e.g. BED files) for the called peaks.

Data access links

*May remain private before publication.*

[https://www.ncbi.nlm.nih.gov/gds/?term=GSE149539\[Accession\]](https://www.ncbi.nlm.nih.gov/gds/?term=GSE149539[Accession])

Files in database submission

2190698\_BE2C-siCtrl-H3K4me1-1.bam

Files in database submission

2190699\_BE2C-siCtrl-H3K4me1-2.bam  
 2190700\_BE2C-siCtrl-H3K27me3-1.bam  
 2190701\_BE2C-siCtrl-H3K27me3-2.bam  
 2190702\_BE2C-si6B33-H3K4me1-1.bam  
 2190703\_BE2C-si6B33-H3K4me1-2.bam  
 2190704\_BE2C-si6B33-H3K27me3-1.bam  
 2190705\_BE2C-si6B33-H3K27me3-2.bam  
 2216739\_BE2C-DMSO-H3K4me1-1.bam  
 2216740\_BE2C-DMSO-H3K4me1-2.bam  
 2216741\_BE2C-DMSO-H3K27me3-1.bam  
 2216742\_BE2C-DMSO-H3K27me3-2.bam  
 2216743\_BE2C-GSKJ4-H3K4me1-1.bam  
 2216744\_BE2C-GSKJ4-H3K4me1-2.bam  
 2216745\_BE2C--GSKJ4-H3K27me3-1.bam  
 2216746\_BE2C--GSKJ4-H3K27me3-2.bam

Genome browser session  
(e.g. [UCSC](#))

n/a

## Methodology

Replicates

Two replicates per treatment

Sequencing depth

| id      | Total       | UniqelyMapped | read length | single or paired-end |
|---------|-------------|---------------|-------------|----------------------|
| 2190698 | 95,348,438  | 18,740,560    | 36          | paired-end           |
| 2190699 | 84,403,362  | 17,829,001    | 36          | paired-end           |
| 2190700 | 59,796,588  | 8,098,406     | 36          | paired-end           |
| 2190701 | 67,670,148  | 8,228,918     | 36          | paired-end           |
| 2190702 | 113,509,424 | 22,738,862    | 36          | paired-end           |
| 2190703 | 107,030,832 | 22,455,279    | 36          | paired-end           |
| 2190704 | 70,549,144  | 10,919,079    | 36          | paired-end           |
| 2190705 | 75,296,930  | 10,772,371    | 36          | paired-end           |
| 2216739 | 84,236,406  | 12,828,690    | 36          | paired-end           |
| 2216740 | 66,989,164  | 10,885,805    | 36          | paired-end           |
| 2216741 | 54,873,664  | 7,257,169     | 36          | paired-end           |
| 2216742 | 47,211,056  | 8,338,370     | 36          | paired-end           |
| 2216743 | 81,382,546  | 12,697,583    | 36          | paired-end           |
| 2216744 | 73,548,156  | 13,008,656    | 36          | paired-end           |
| 2216745 | 50,040,762  | 12,599,936    | 36          | paired-end           |
| 2216746 | 38,220,538  | 8,975,504     | 36          | paired-end           |

Antibodies

H3K27me3 Cell Signaling Technology Cat# 9733, RRID:AB\_2616029  
 H3K4me1 Abcam Cat# ab8895, RRID:AB\_306847

Peak calling parameters

Information in Supplementary Data 1 and 2

Data quality

Data quality was assessed by SPP (version 1.11).

Software

BWA (version 0.7.12)  
 Picard (version 1.65)  
 amtools (version 1.3.1)  
 R (version 3.5.1)  
 IGV (version 2.3.82)  
 genomeCoverageBed (bedtools 2.25.0)  
 MACS2 (version 2.1.1)  
 SICER (version 1.1)  
 HOMER suite (v4.8.3)
